# Supplementary material
Source: PubMed Central journal article supplement (PMC1131871)

deltex, dx, CG3929; X: 6378641-6383818

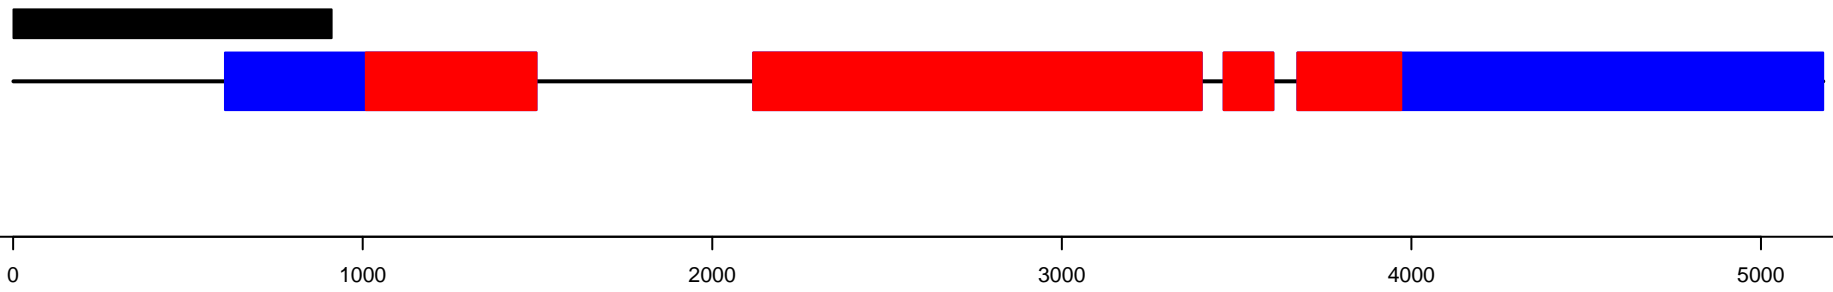

cut, ct, CG11387; X: 7454384-7493401

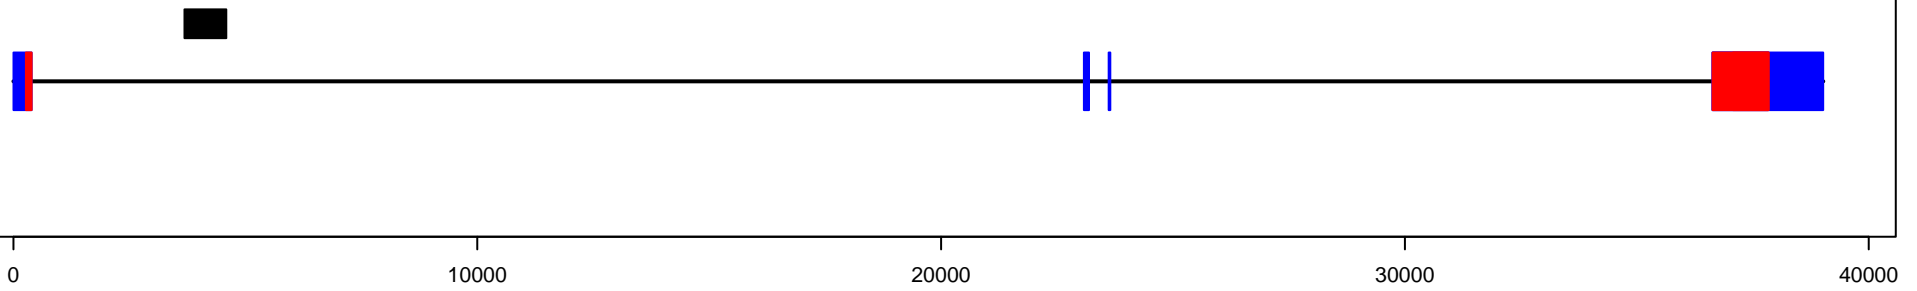

dishevelled, dsh, CG18361; X: 11200715-11203944

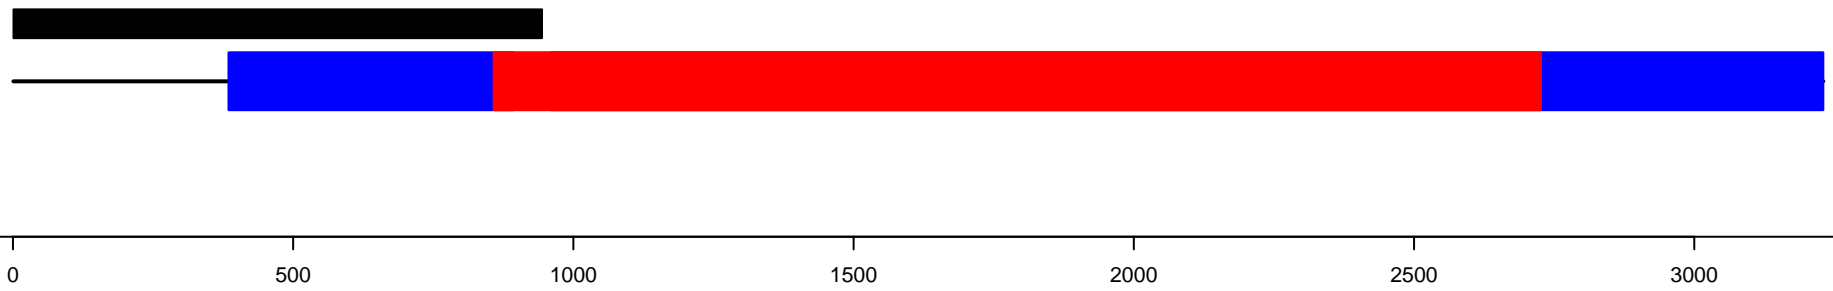

scalloped, sd, CG8544; X: 15645226-15659673

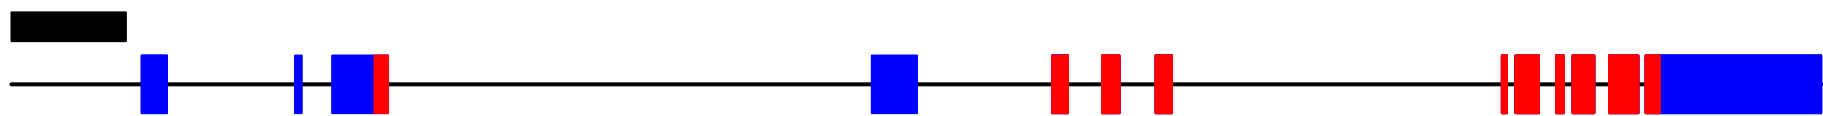

0 5000 10000 15000

Beadex, Bx, CG6500; X: 18368602-18405653

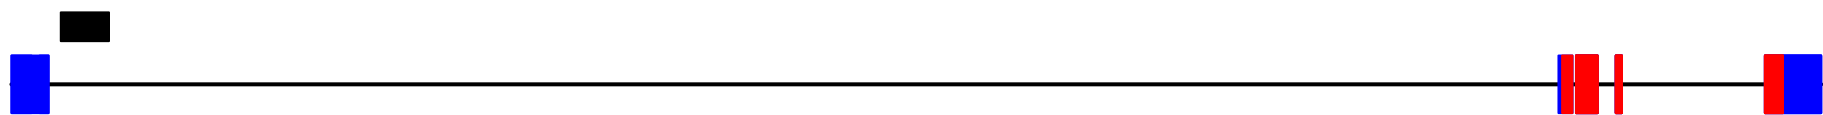

0 10000 20000 30000

split ends, spen, CG18497; 2L: 159034-203251

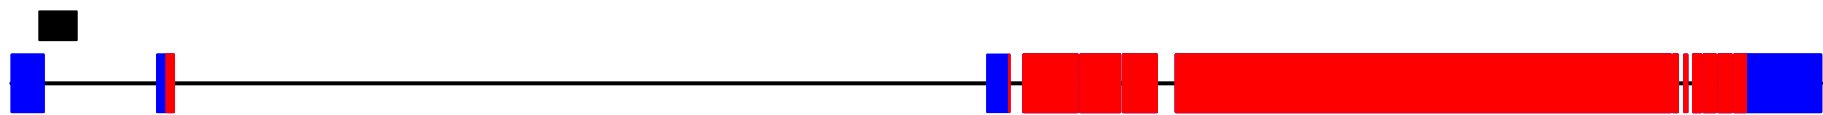

0 10000 20000 30000 40000

friend of echinoid, fred, CG31774; 2L: c(3905513-3948359)

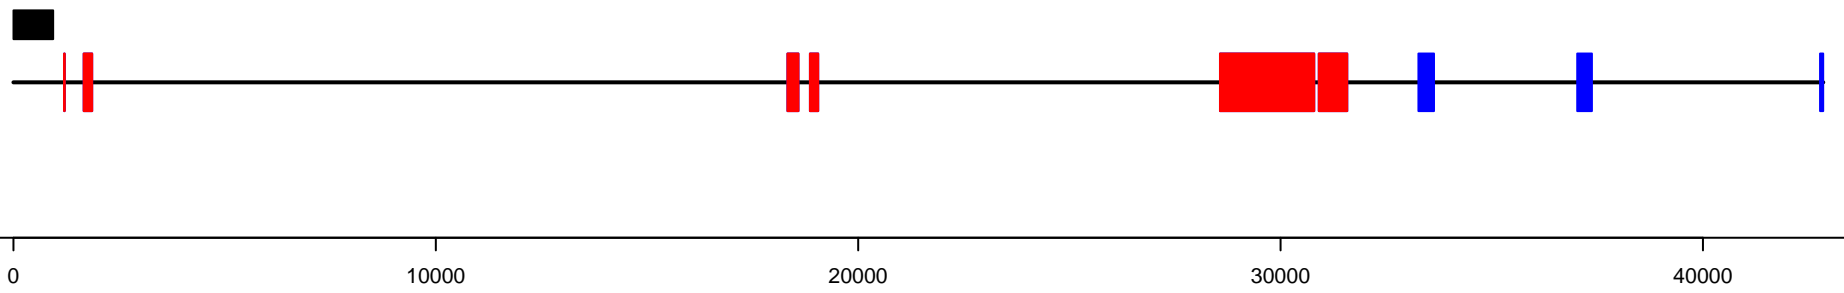

wingless, wg, CG4889; 2L: 7307161-7342206

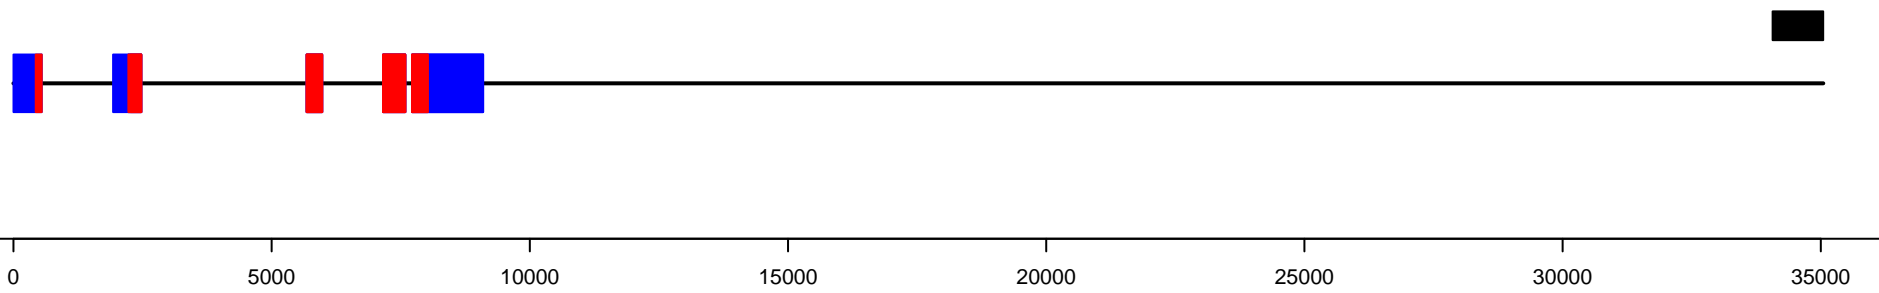

numb, numb, CG3779; 2L: 9437513-9463293

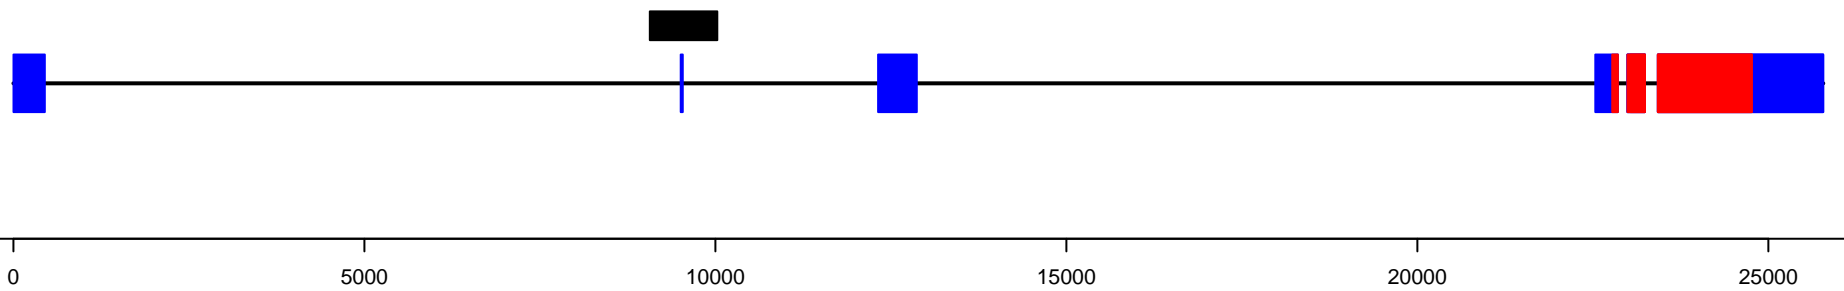

daughterless, da, CG5102; 2L: 10388078–10392786

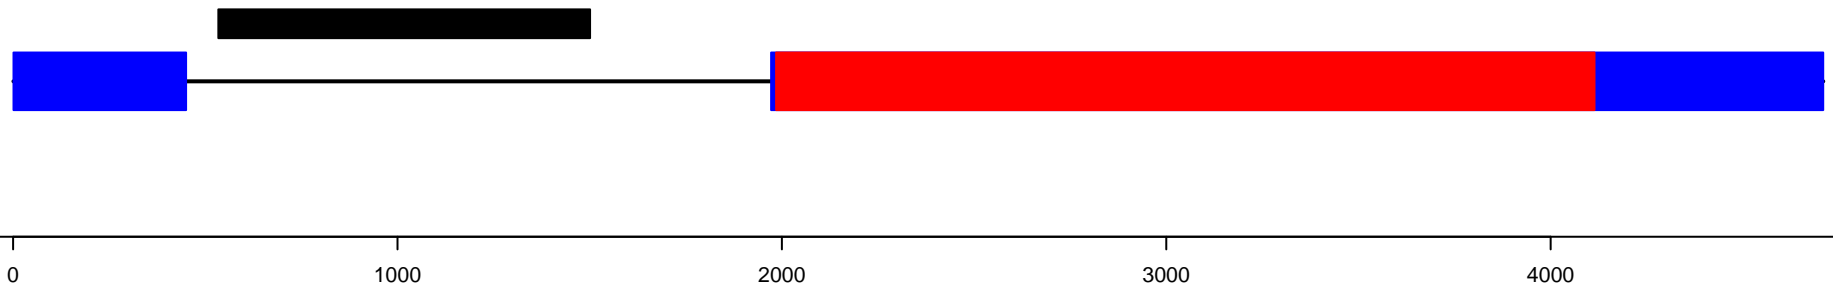

deadpan, dpn, CG8704; 2R: c(3740784–3746052)

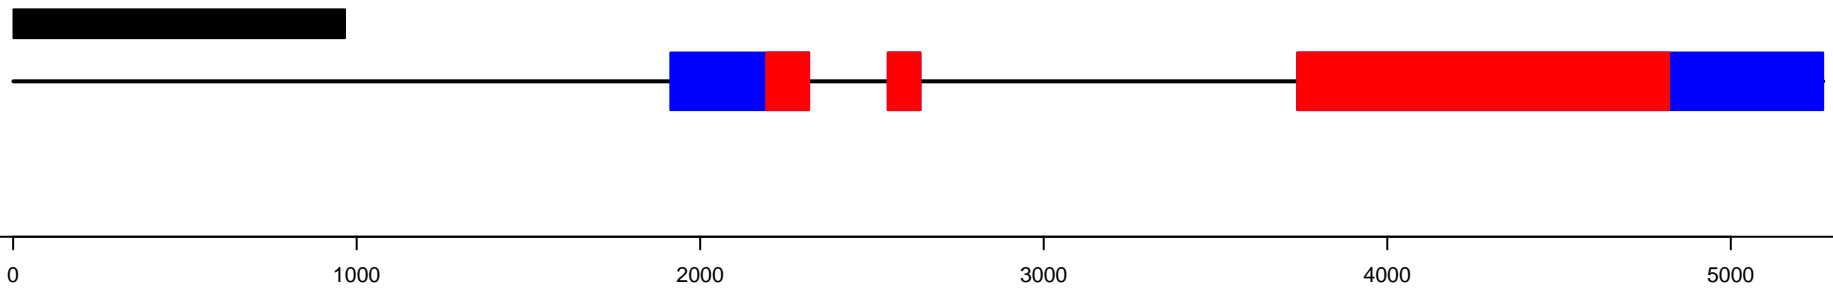

scabrous, sca, CG17579; 2R: 8295526–8300649

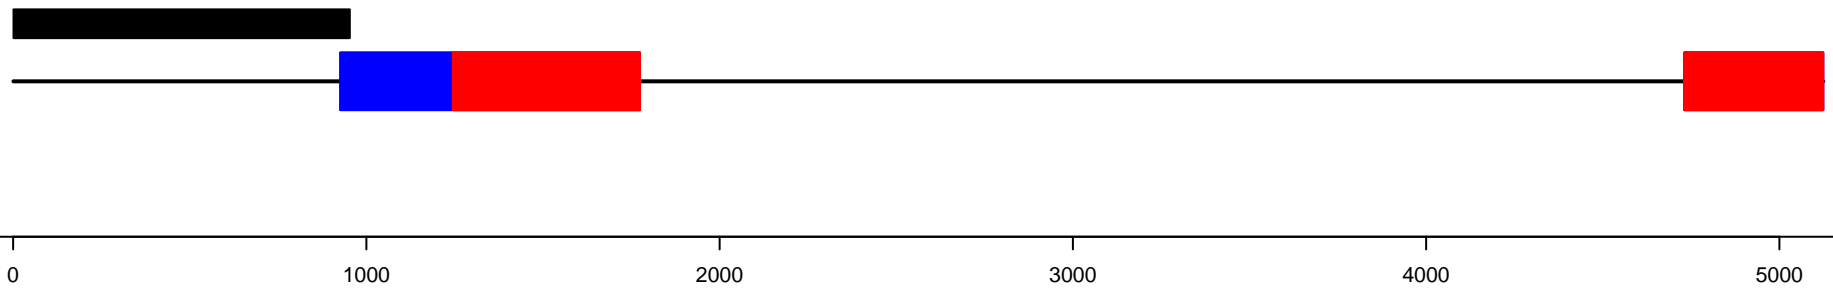

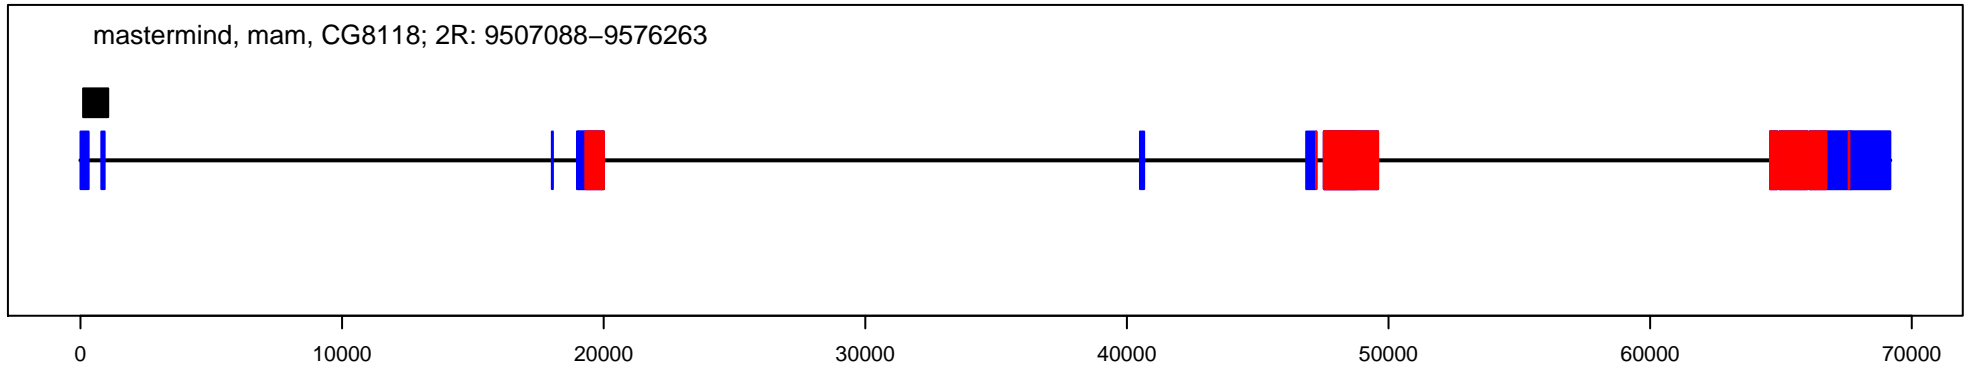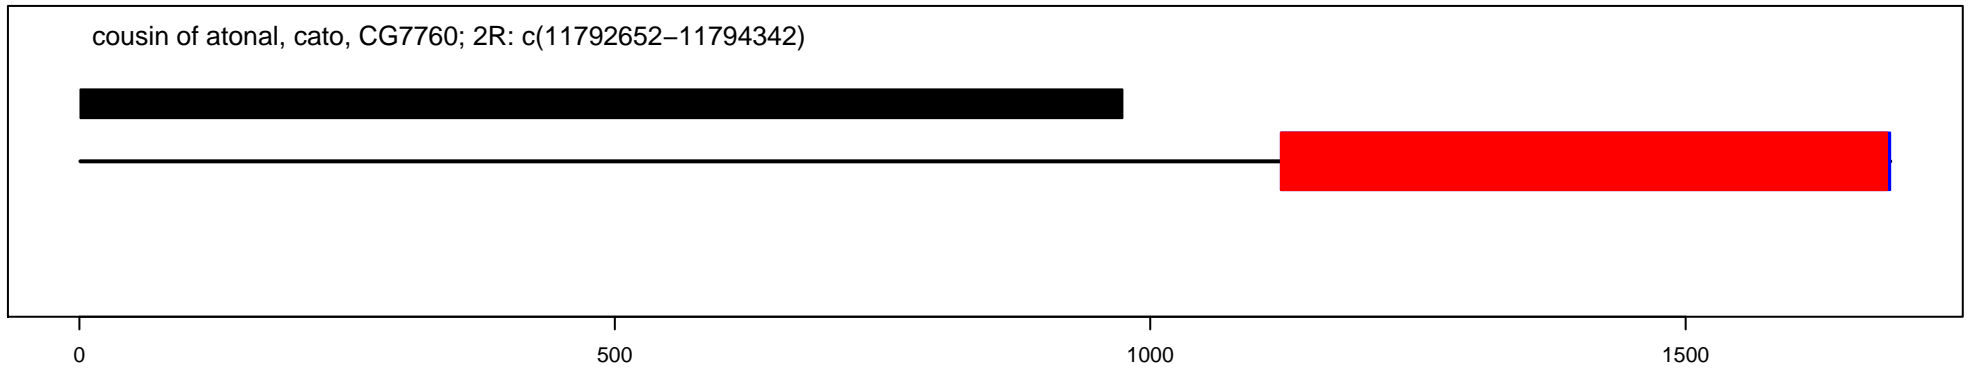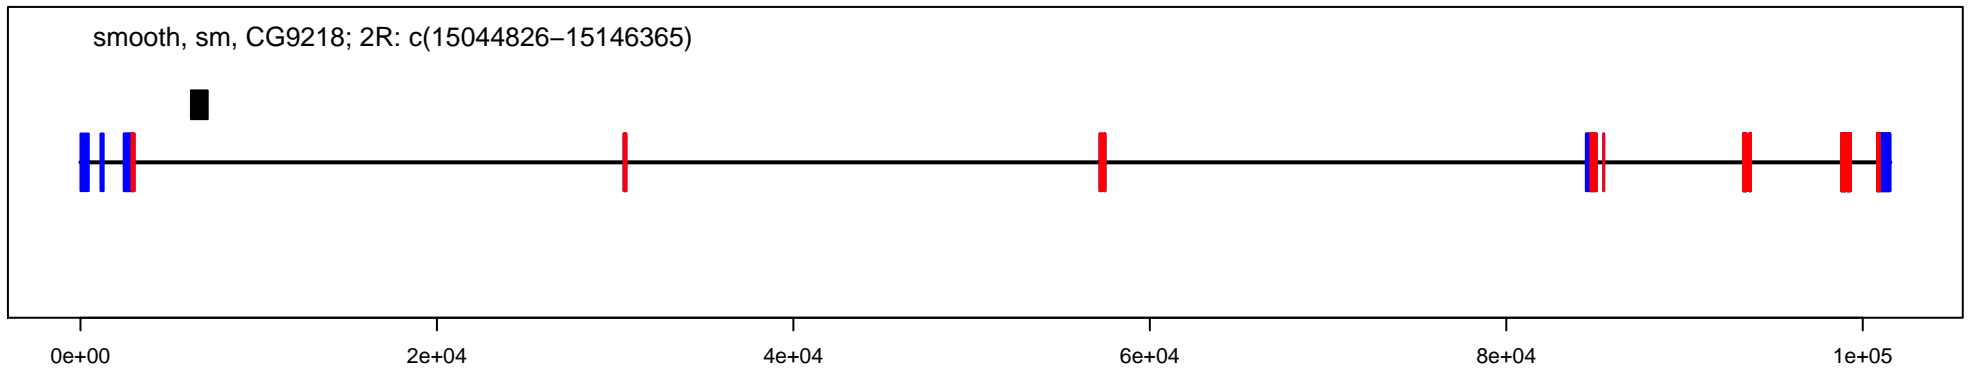

Distal-less, Dll, CG3629; 2R: 20321770-20342763

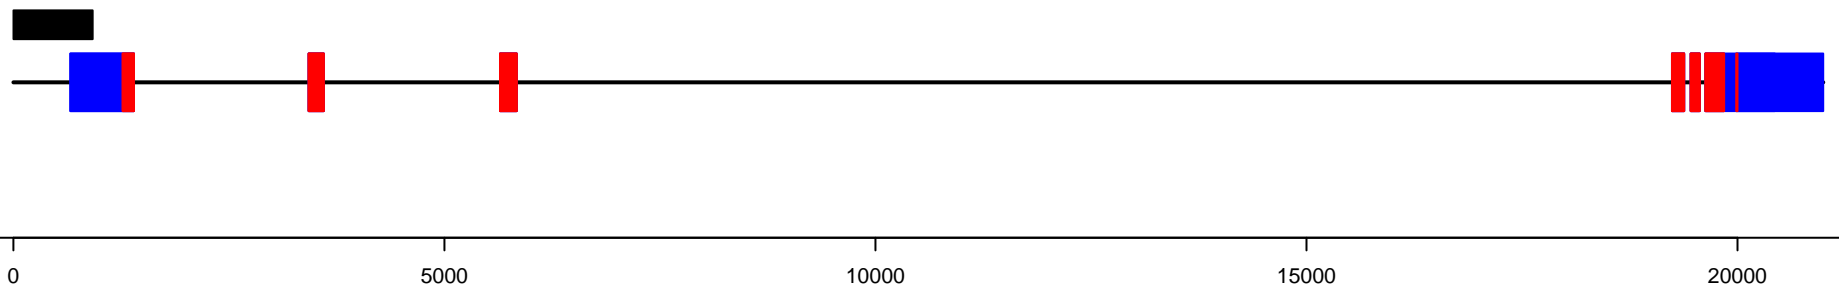

extra macrochaetae, emc, CG1007; 3L: 732317-737037

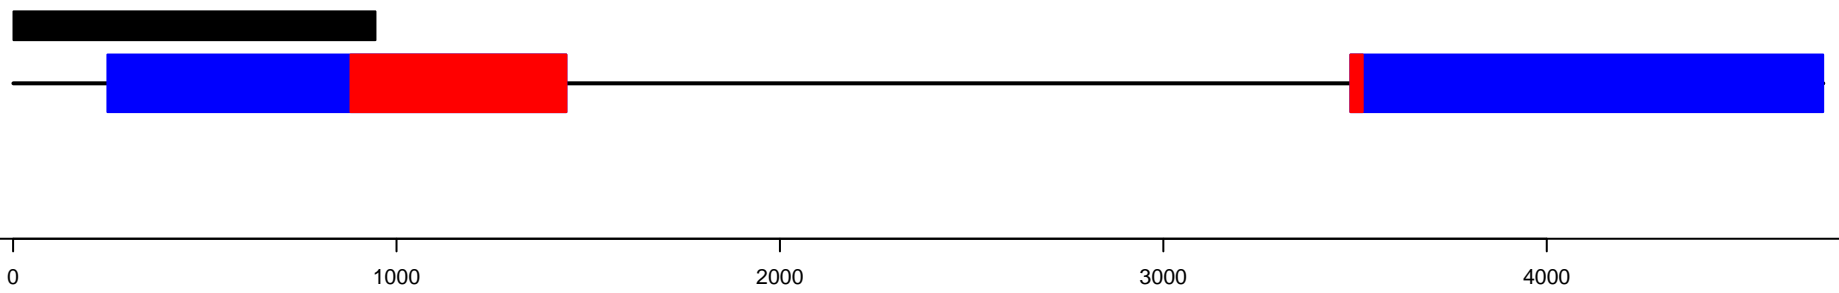

vein, vn, CG10491; 3L: c(5787637-5820737)

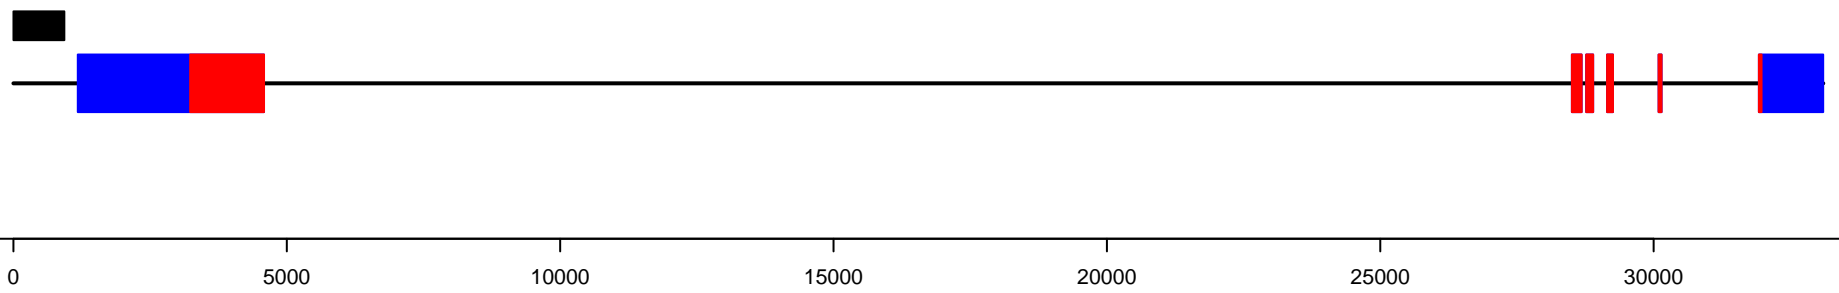

quemao, qm, CG8593; 3L: 7322262-7327578

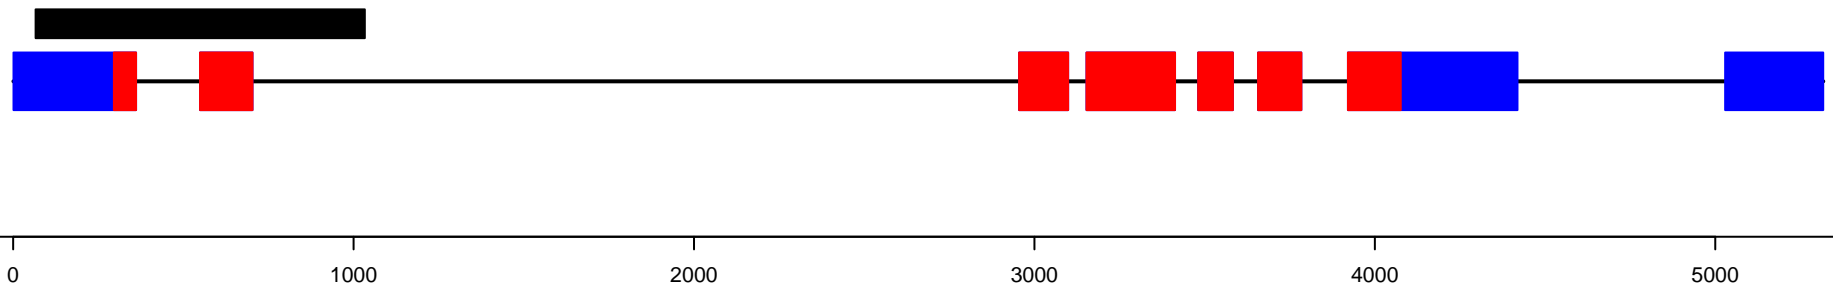

Bearded, Brd, CG3096; 3L: 14937928-14938849

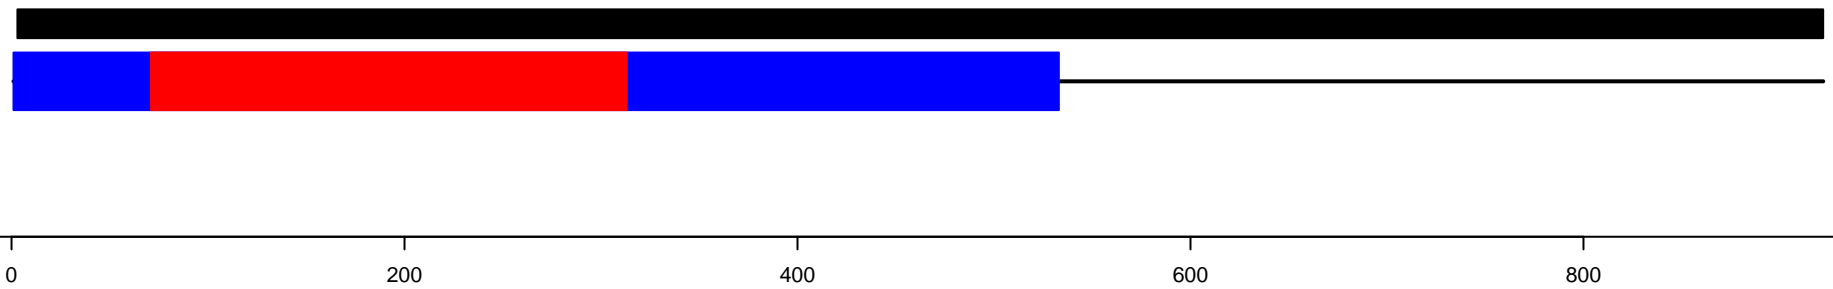

neuralized, neur, CG11988; 3R: c(4846068-4865189)

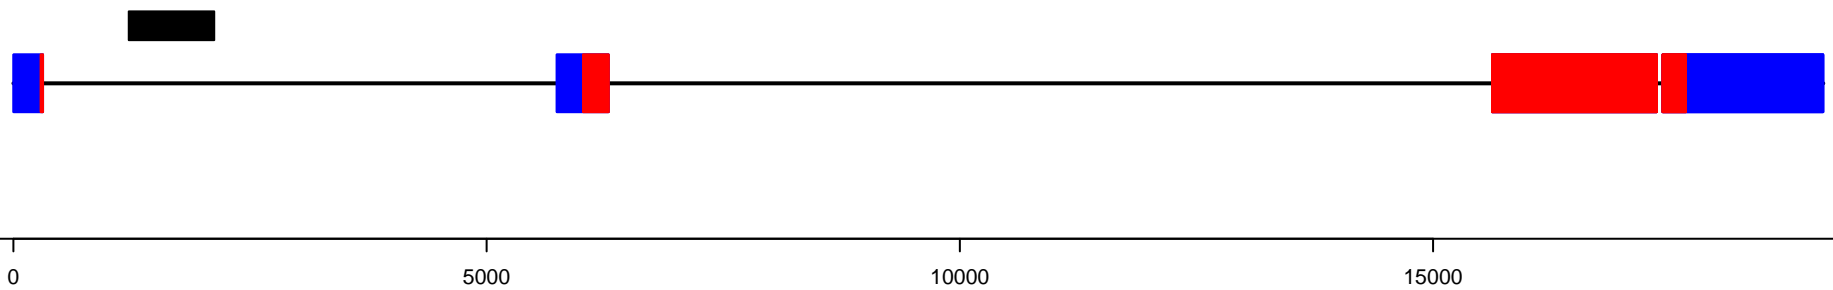

Actin 88F, ACt88F, CG5178; 3R: 11264810–11267895

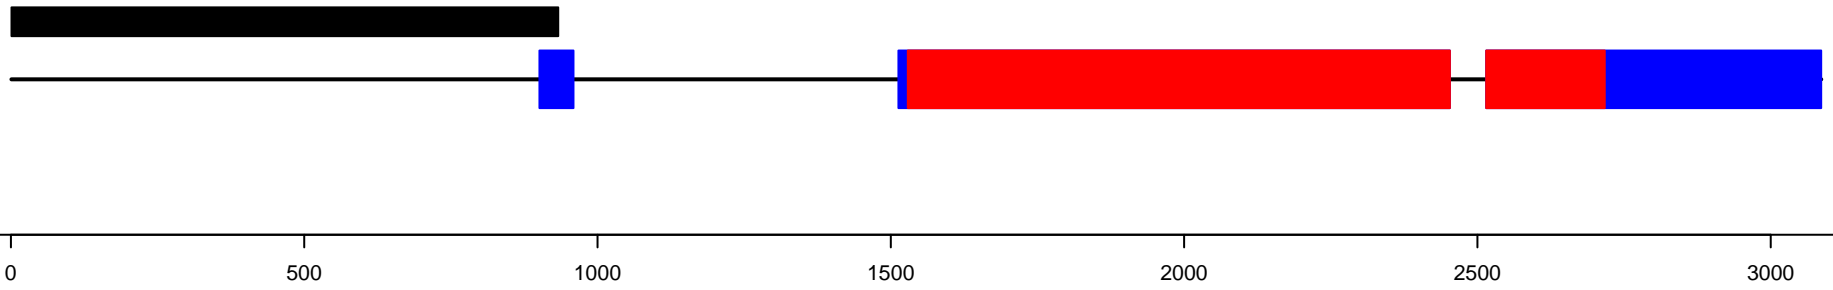

Hairless, H, CG5460; 3R: 16447259–16454637

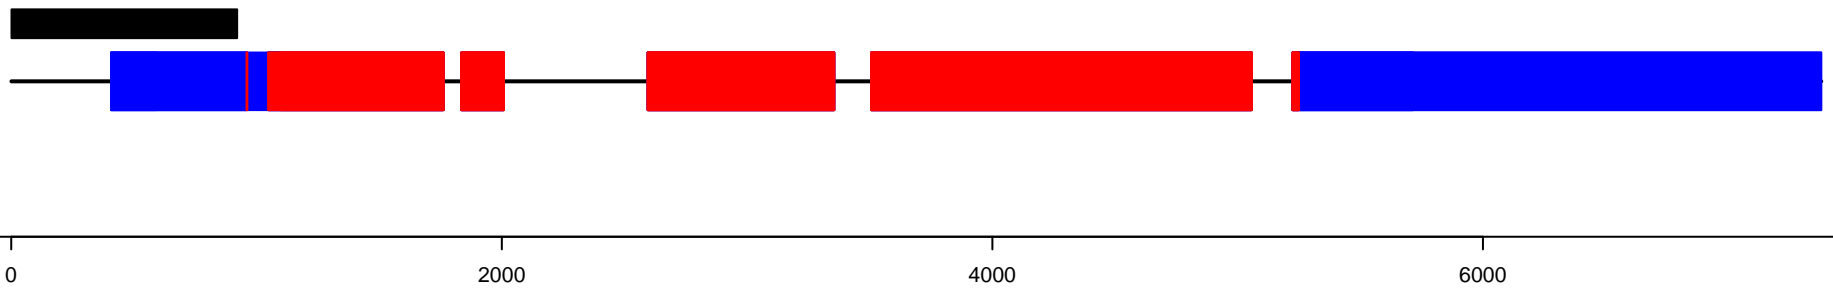

pointed, pnt, CG17077; 3R: c(19116826–19171884)

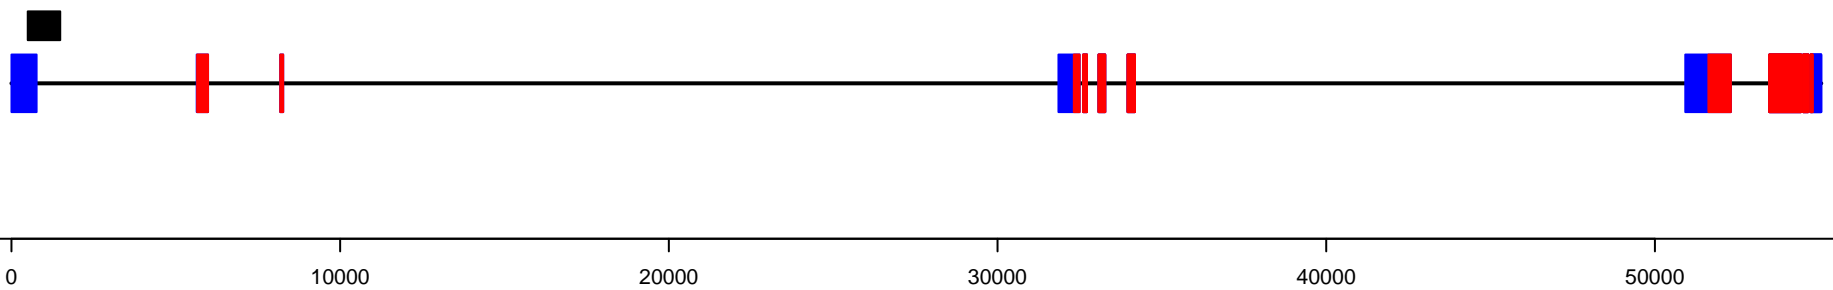



Serrate, Ser, CG6127; 3R: c(22997818-23019716)

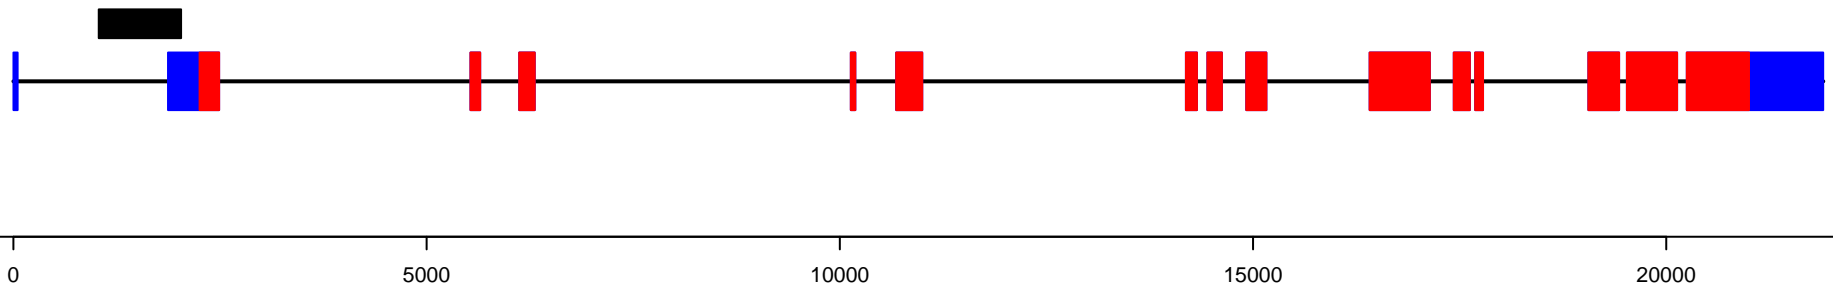

tramtrack, ttk, CG1856; 3R: 27539606-27561114

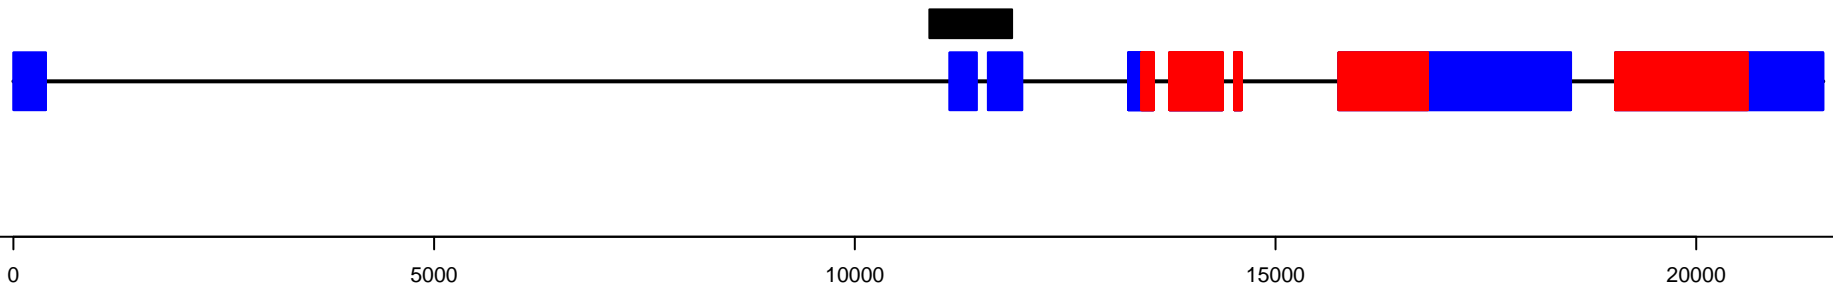

Supplement: pnas_102_suppl-1_6614__2.pdf [file pnas_102_suppl-1_6614__2.pdf]
