# Supplementary material
Source: PubMed Central journal article supplement (PMC1131871)

# Actin 88F (Full dataset)

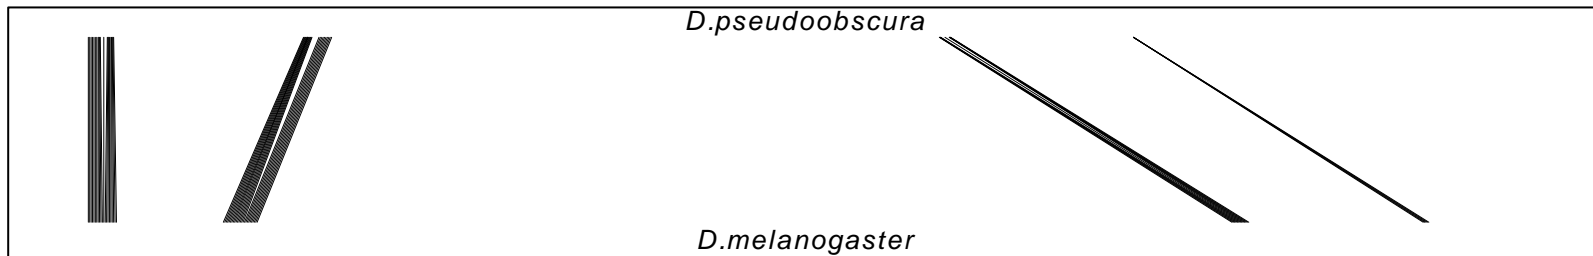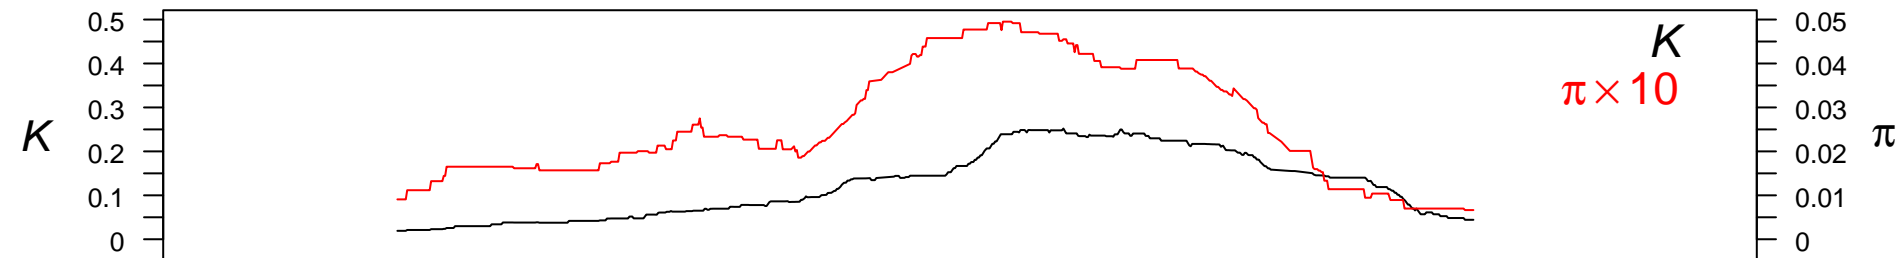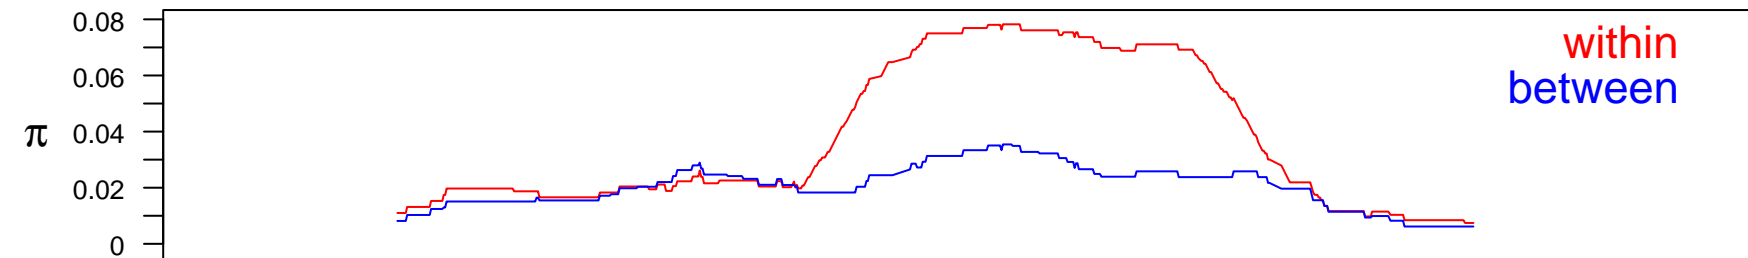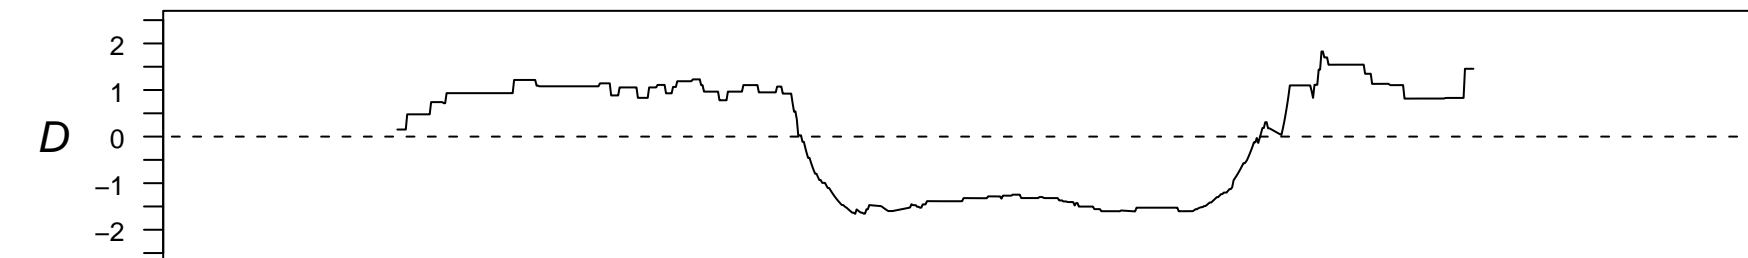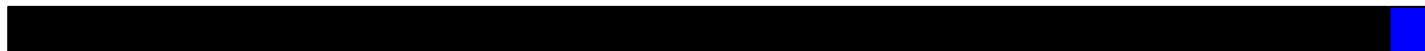

# Actin 88F (Partial dataset)

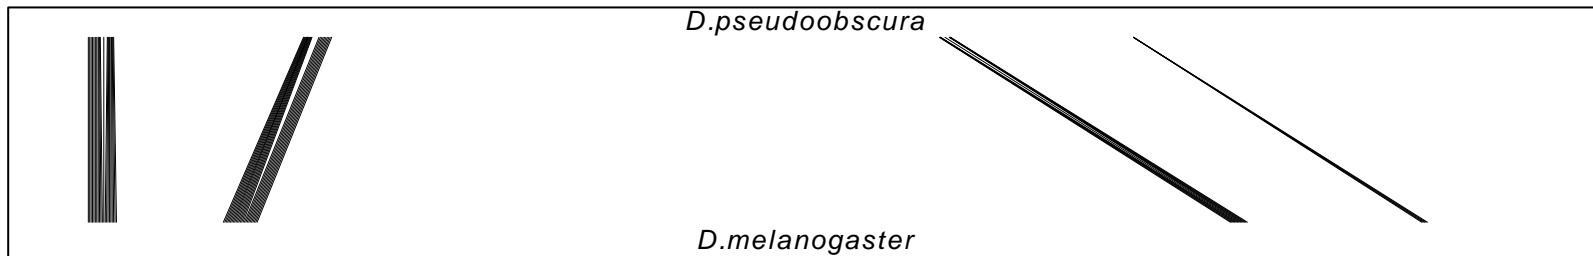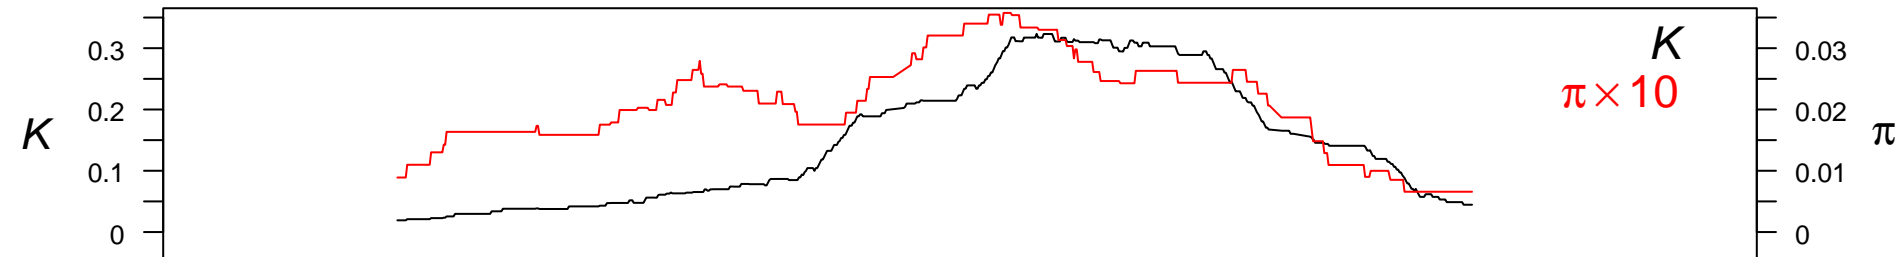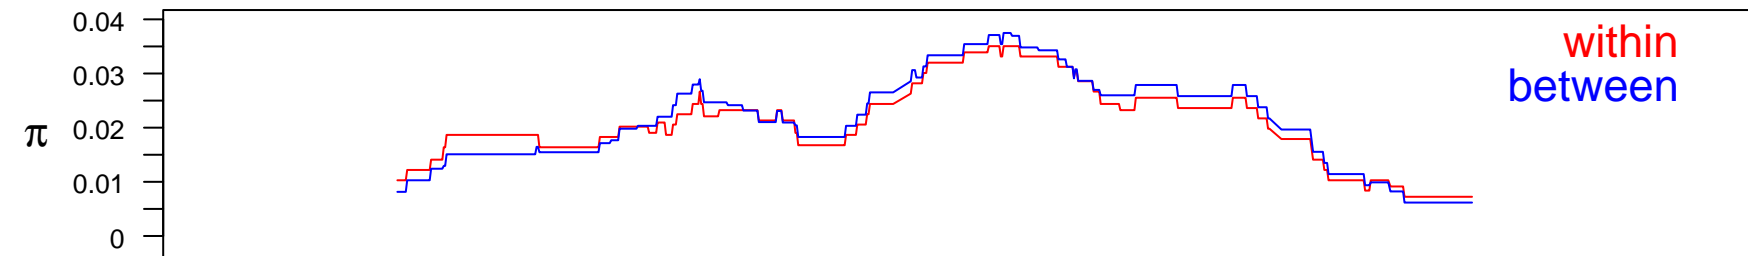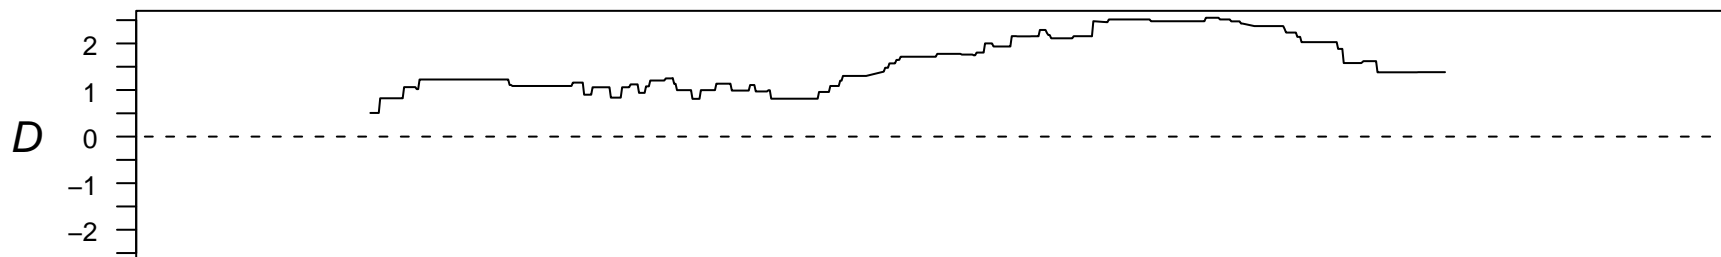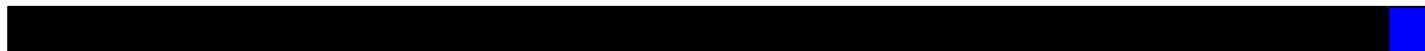

# Bearded

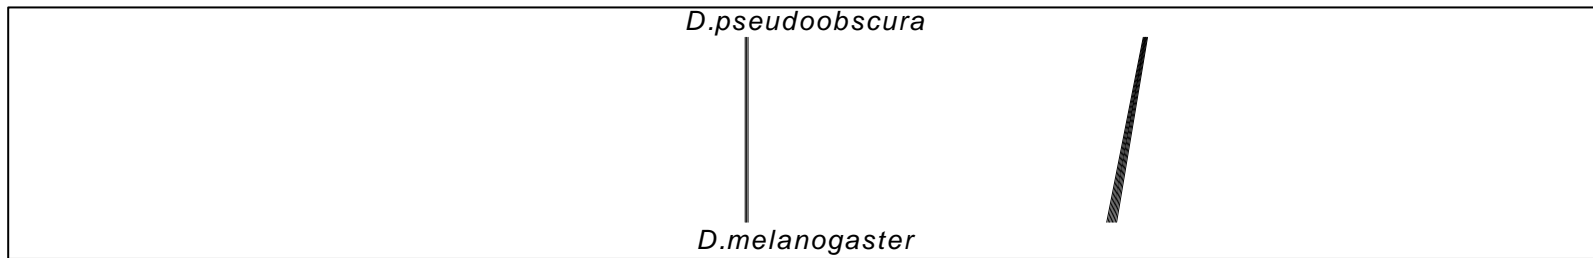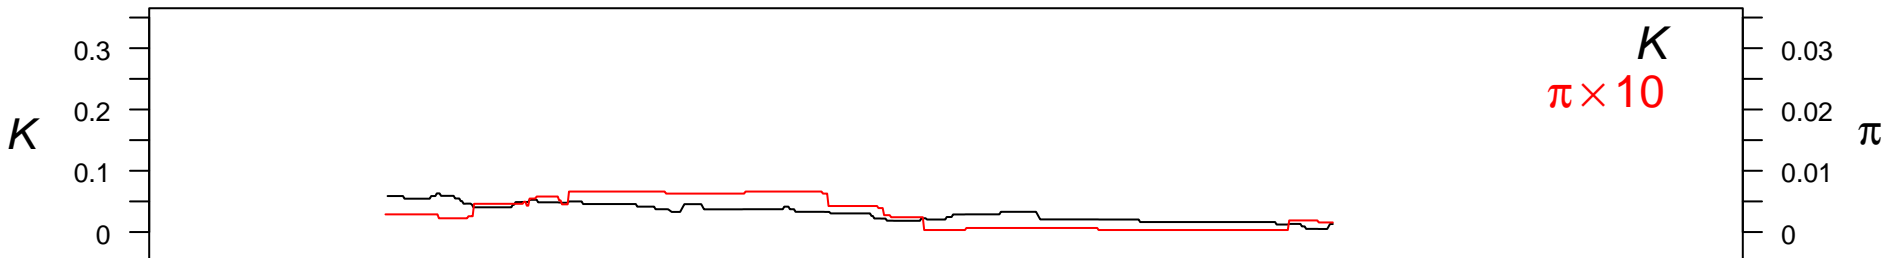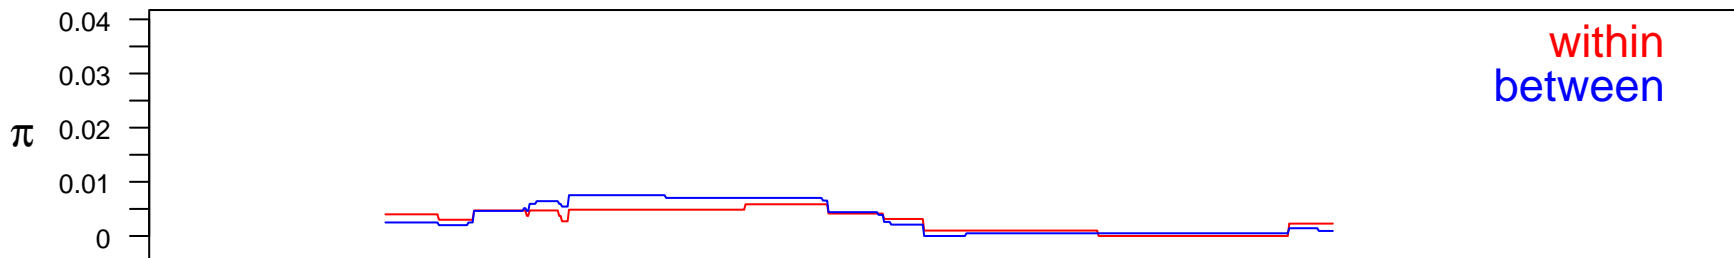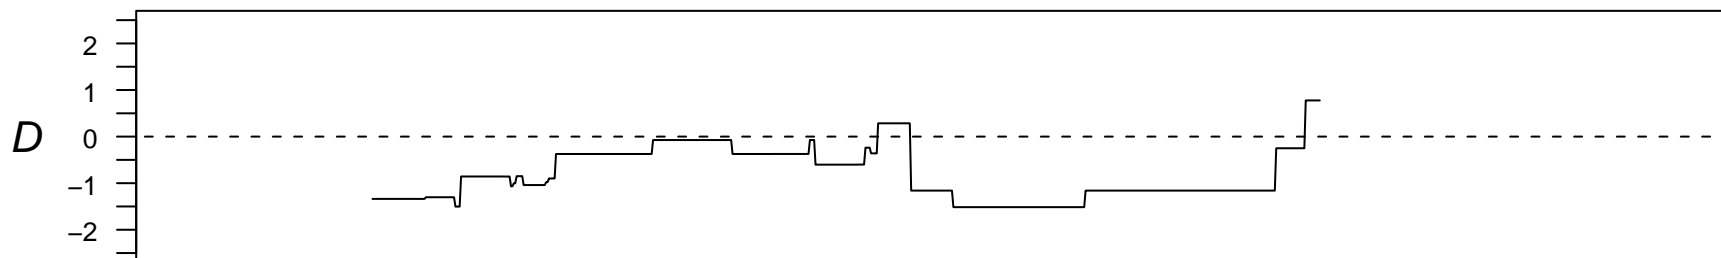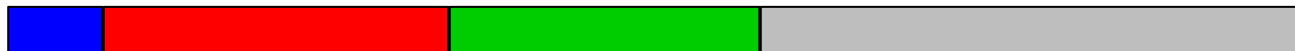

# Beadex

*D.pseudoobscura*

*D.melanogaster*

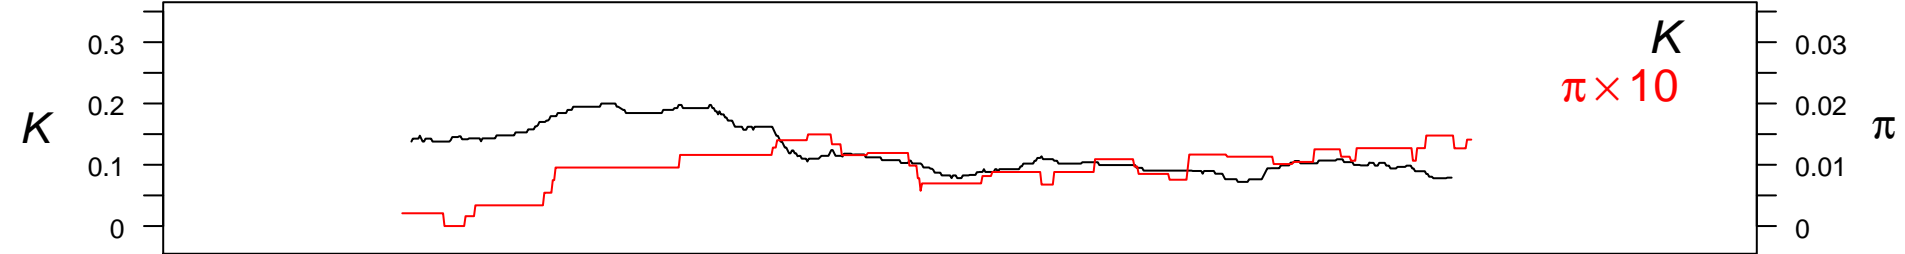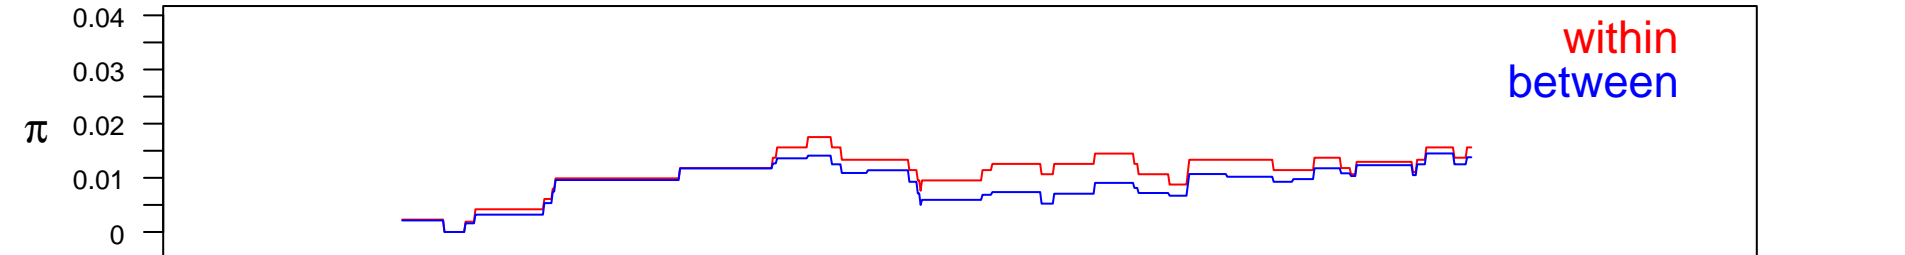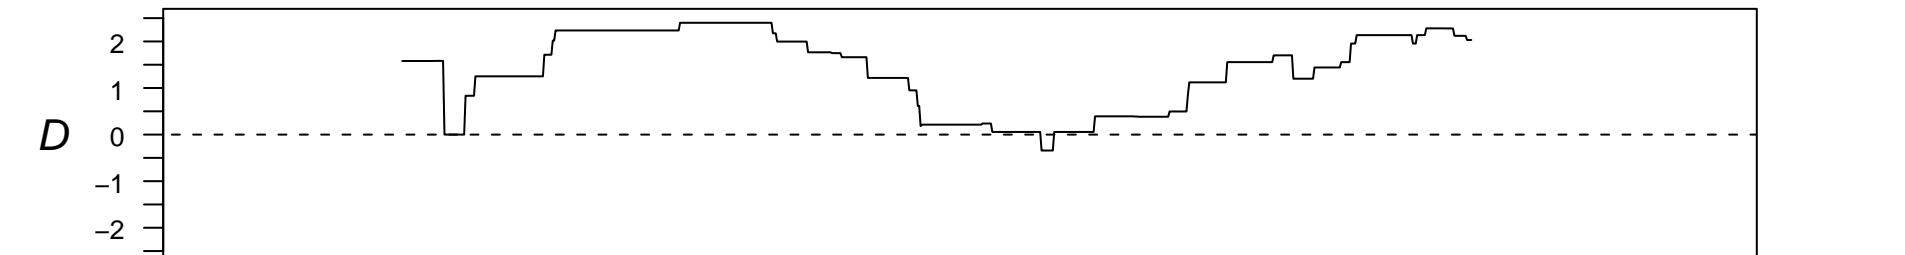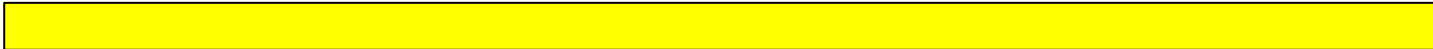

# cousin of atonal

*D.pseudoobscura*

*D.melanogaster*

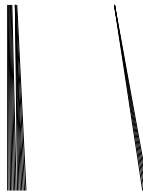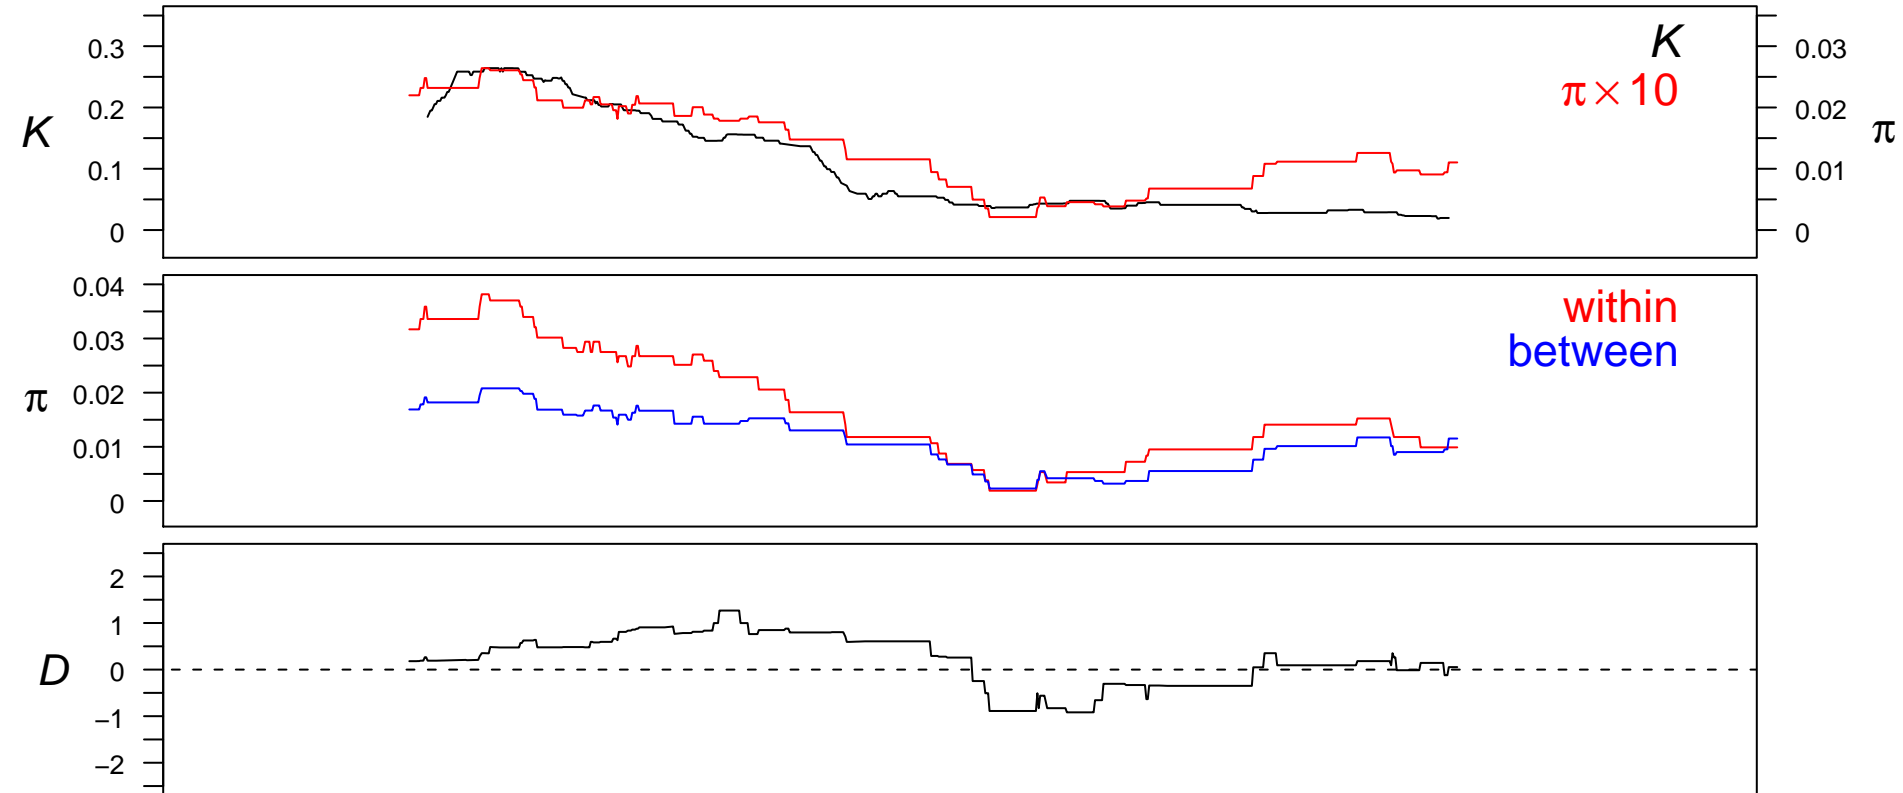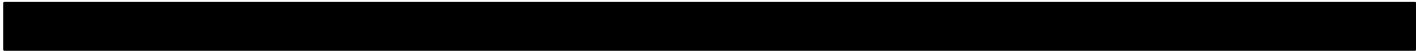

# cut

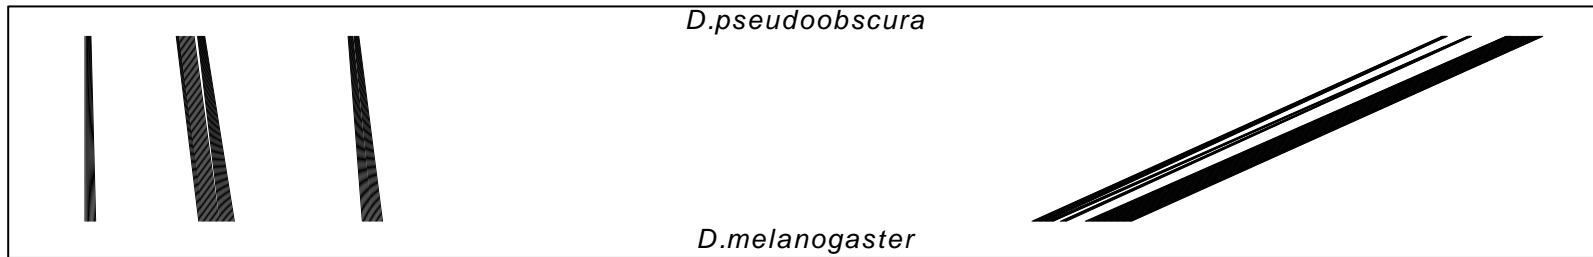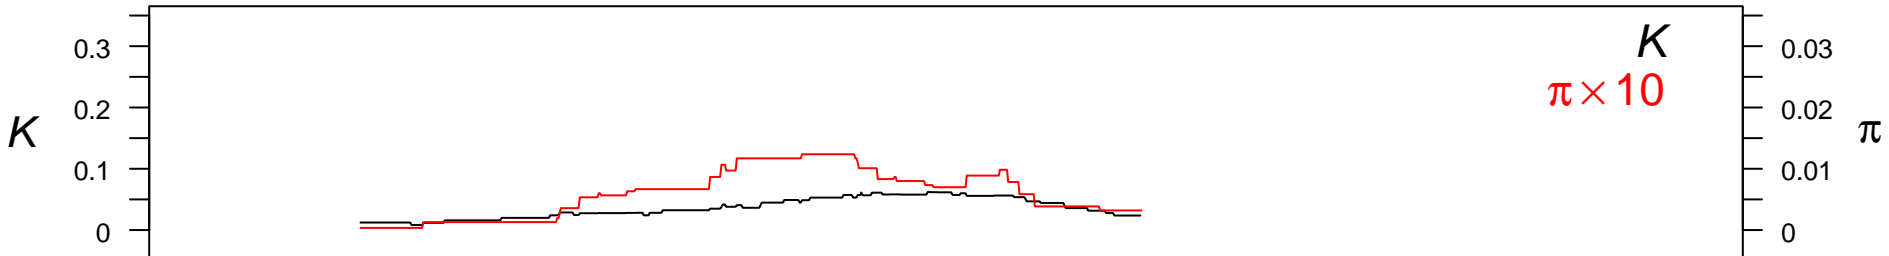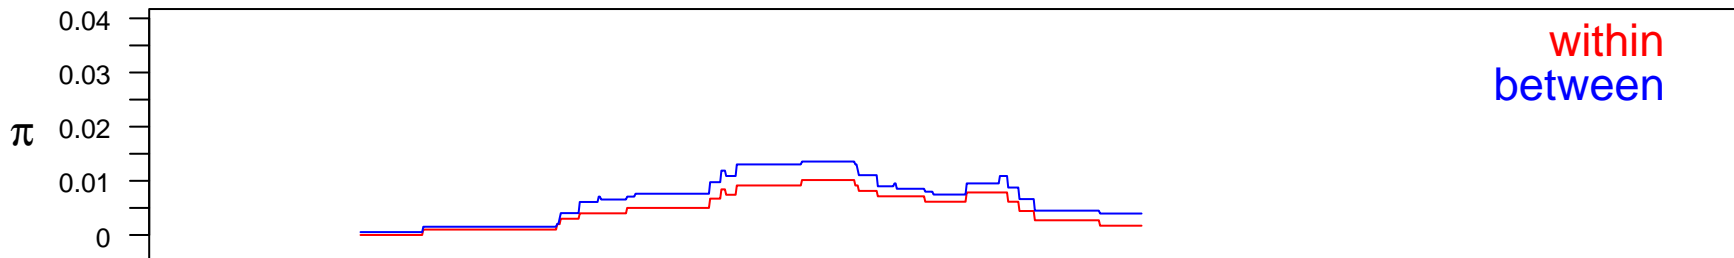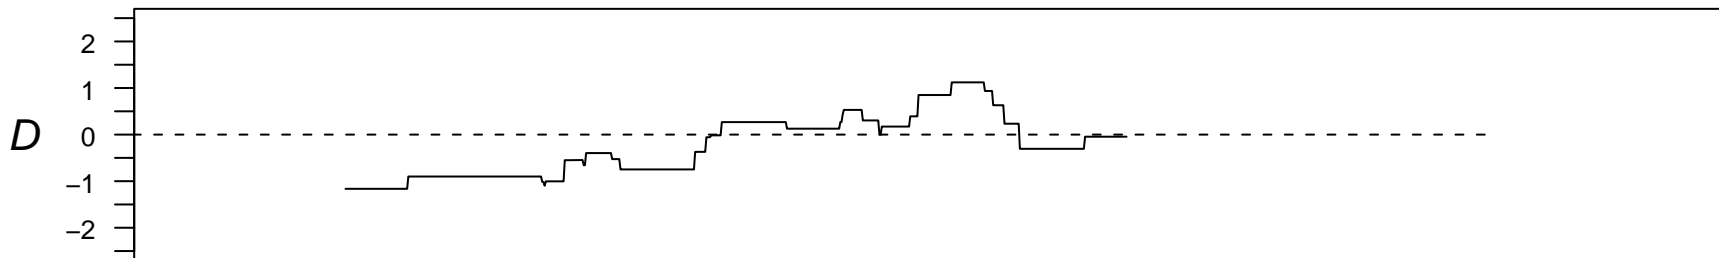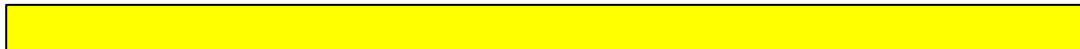

# daughterless

*D.pseudoobscura*

*D.melanogaster*

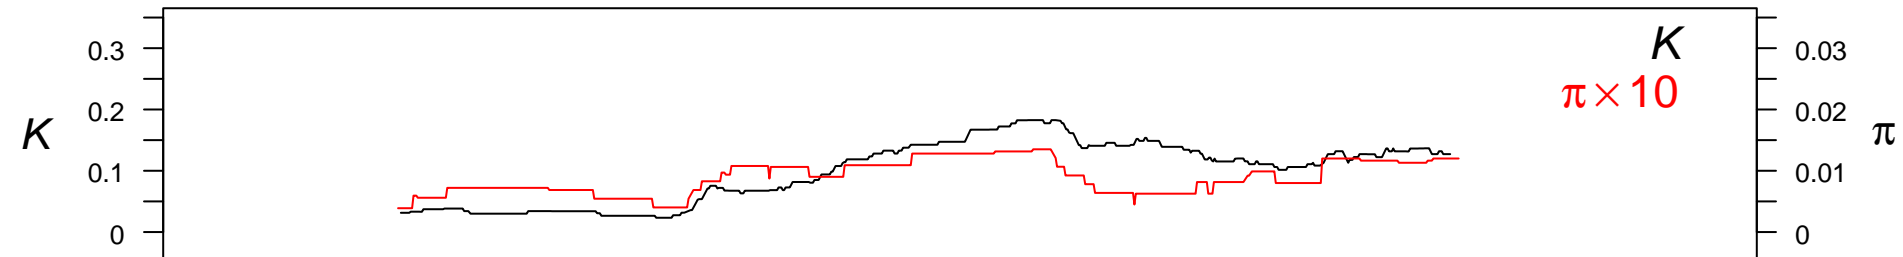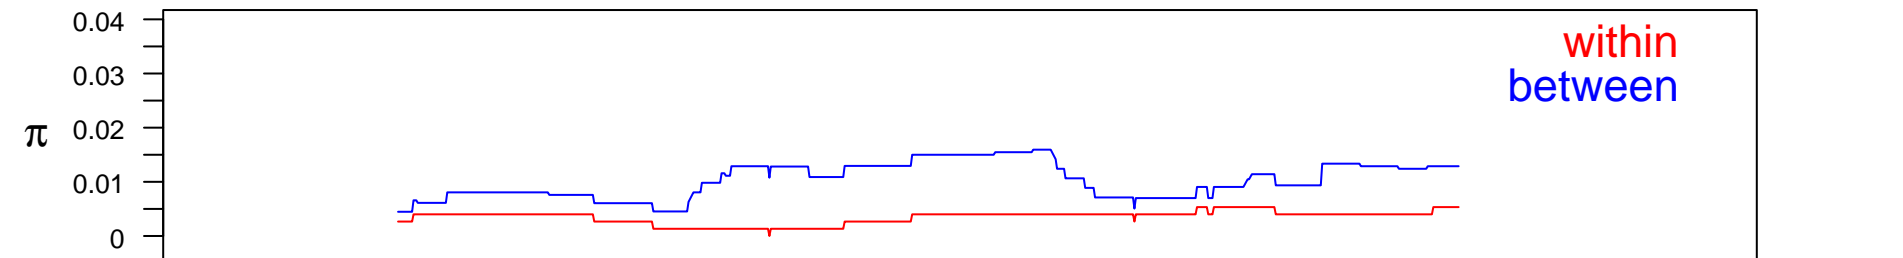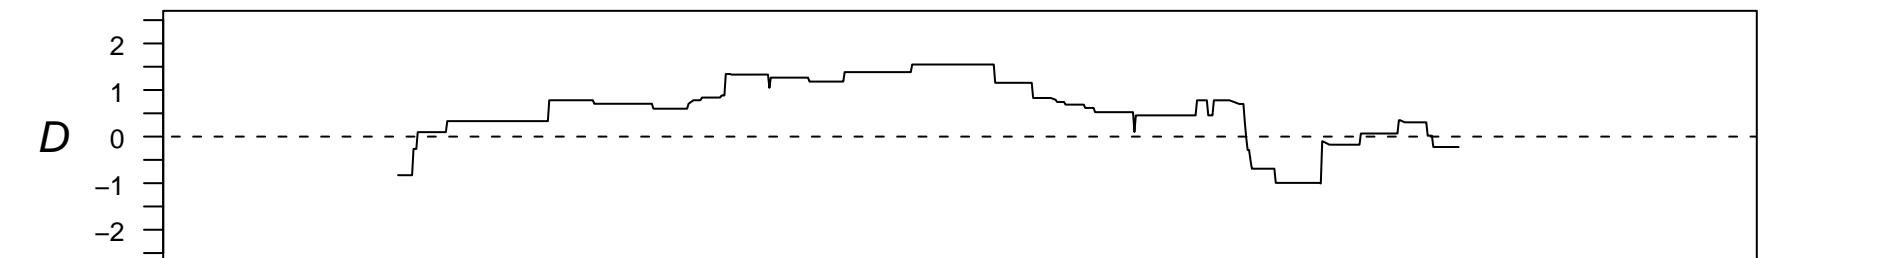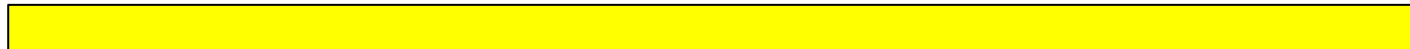

# Distal-less

*D.pseudoobscura*

*D.melanogaster*

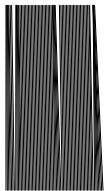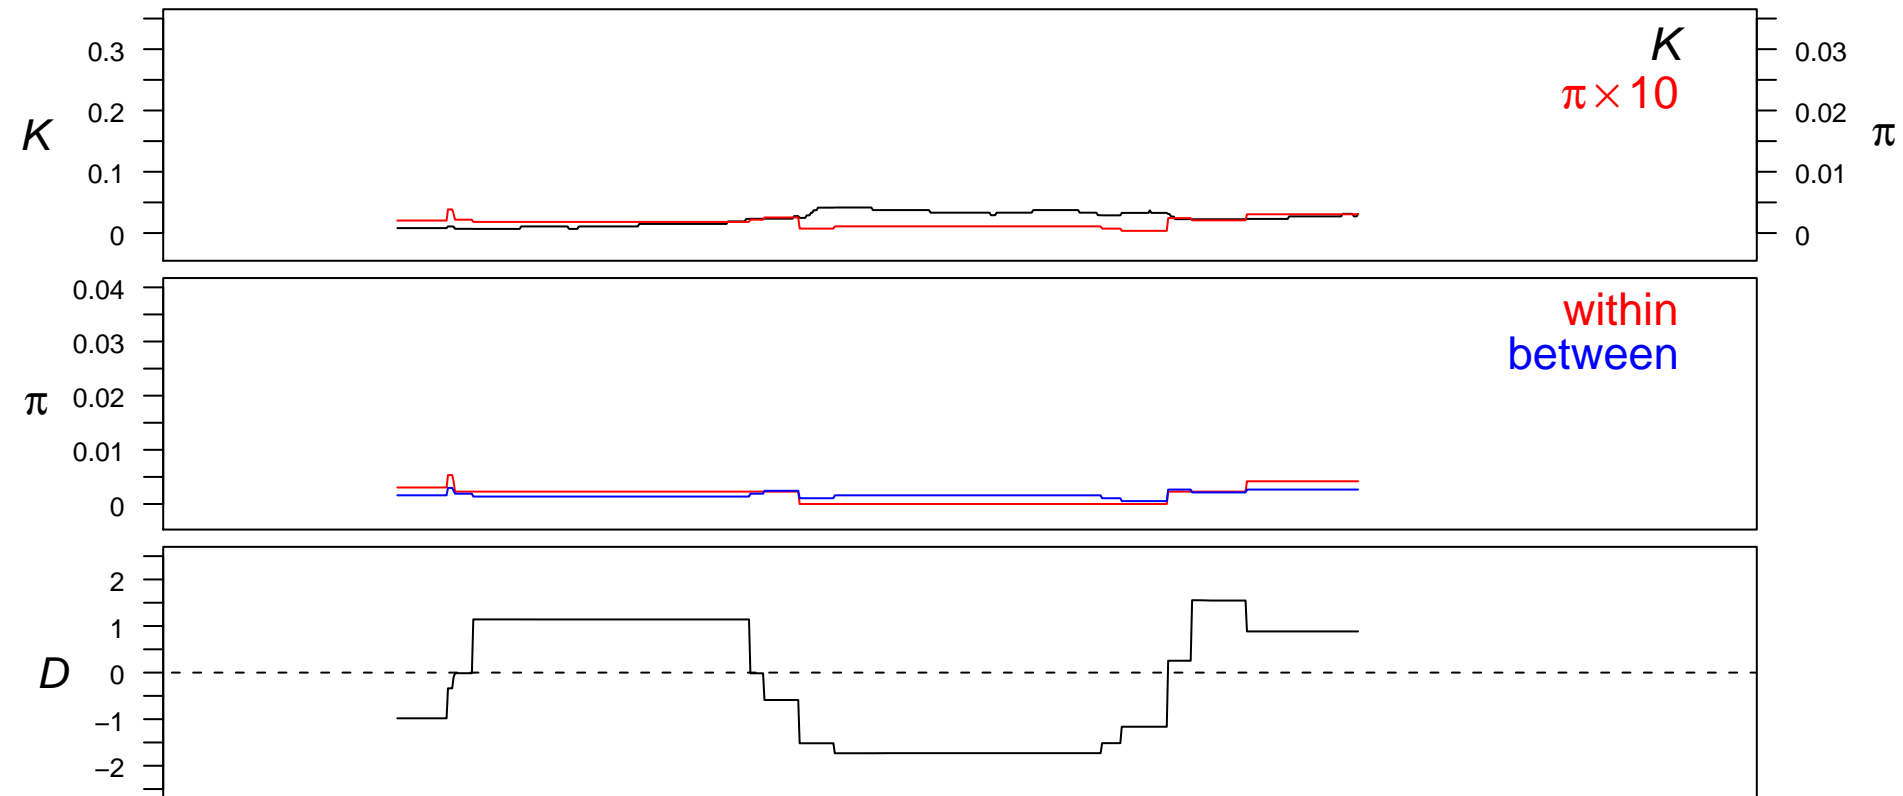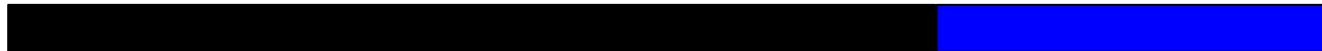



# deadpan

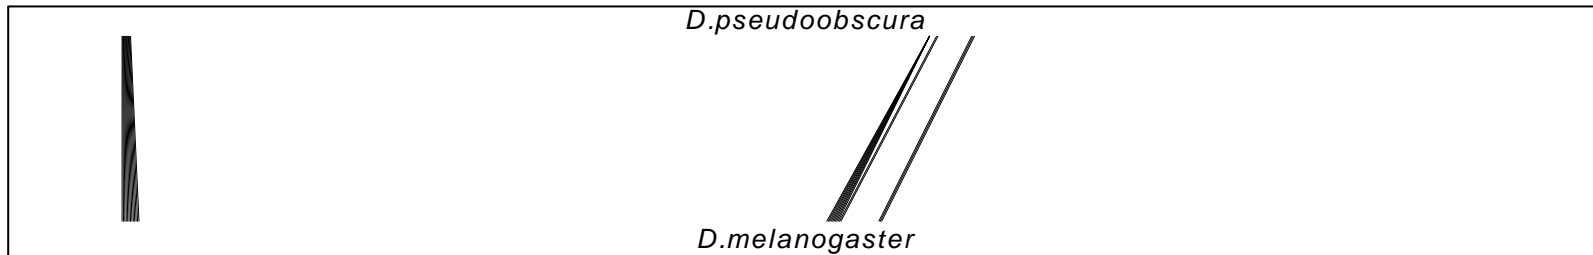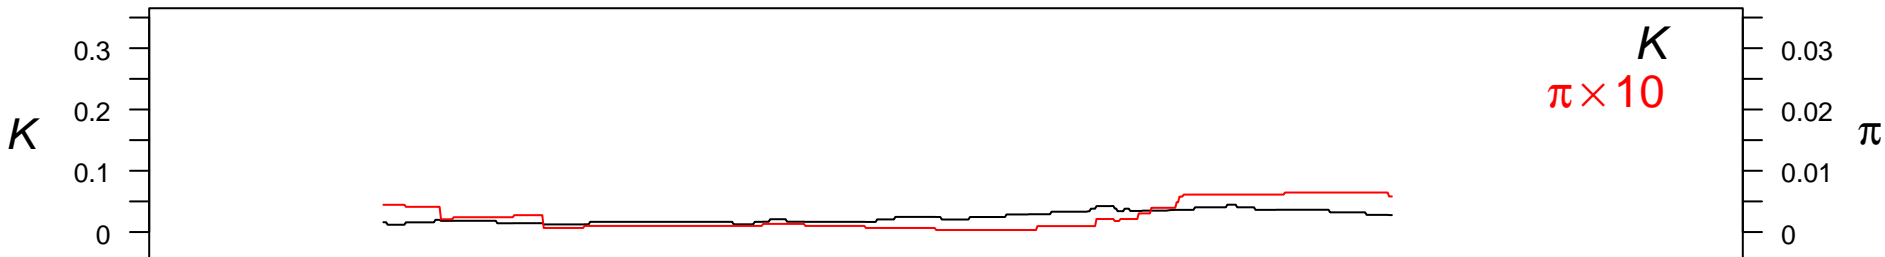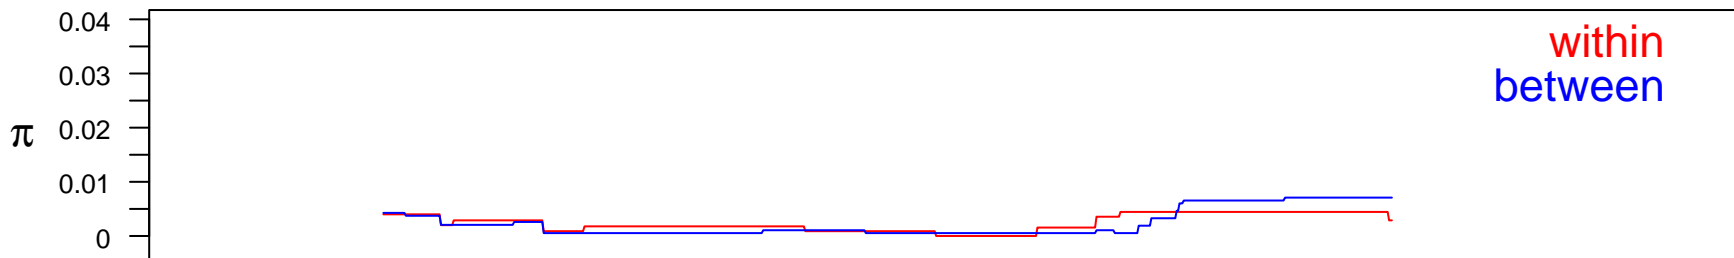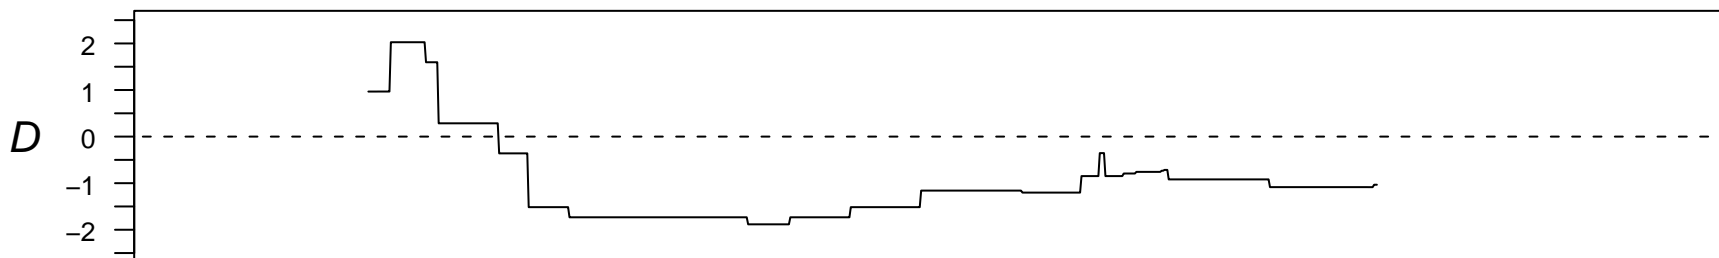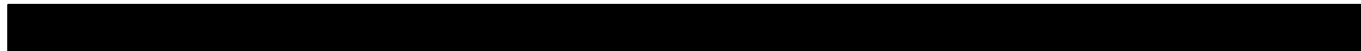

# dishevelled

*D.pseudoobscura*

*D.melanogaster*

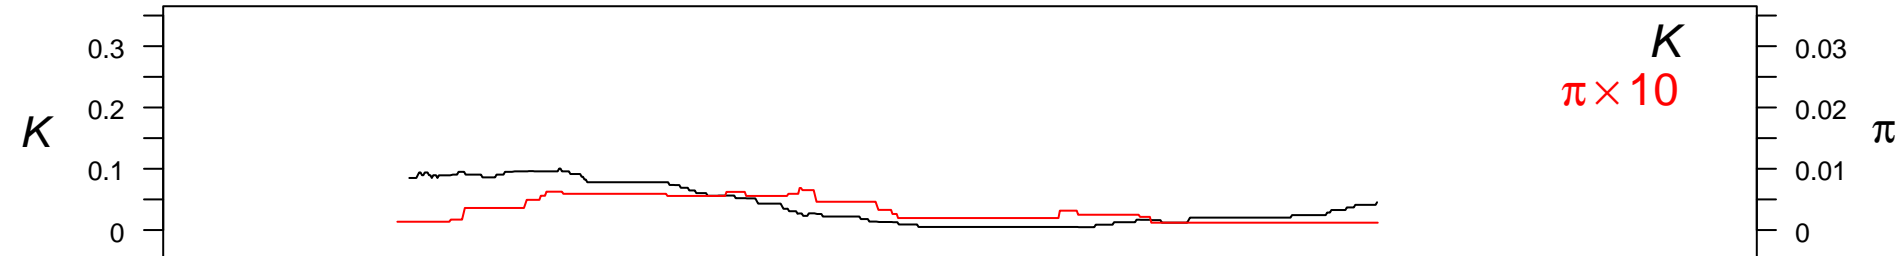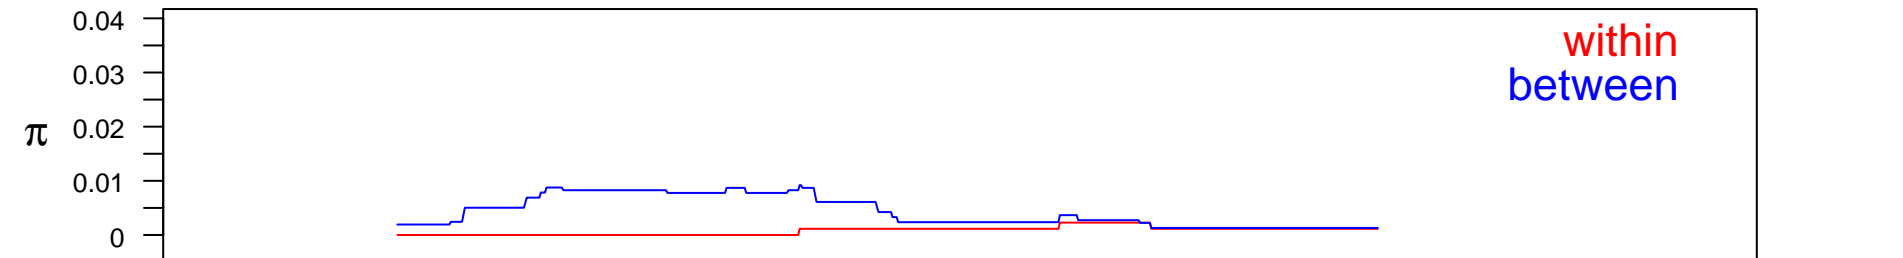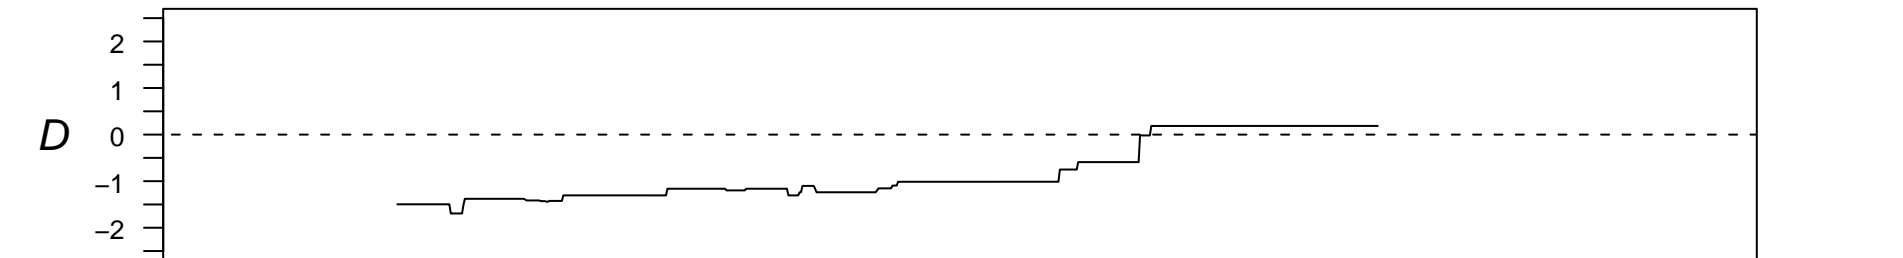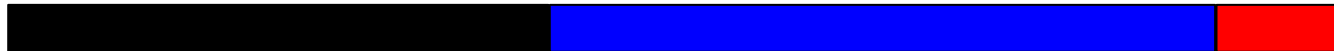

# deltex

*D.pseudoobscura*

*D.melanogaster*

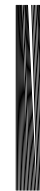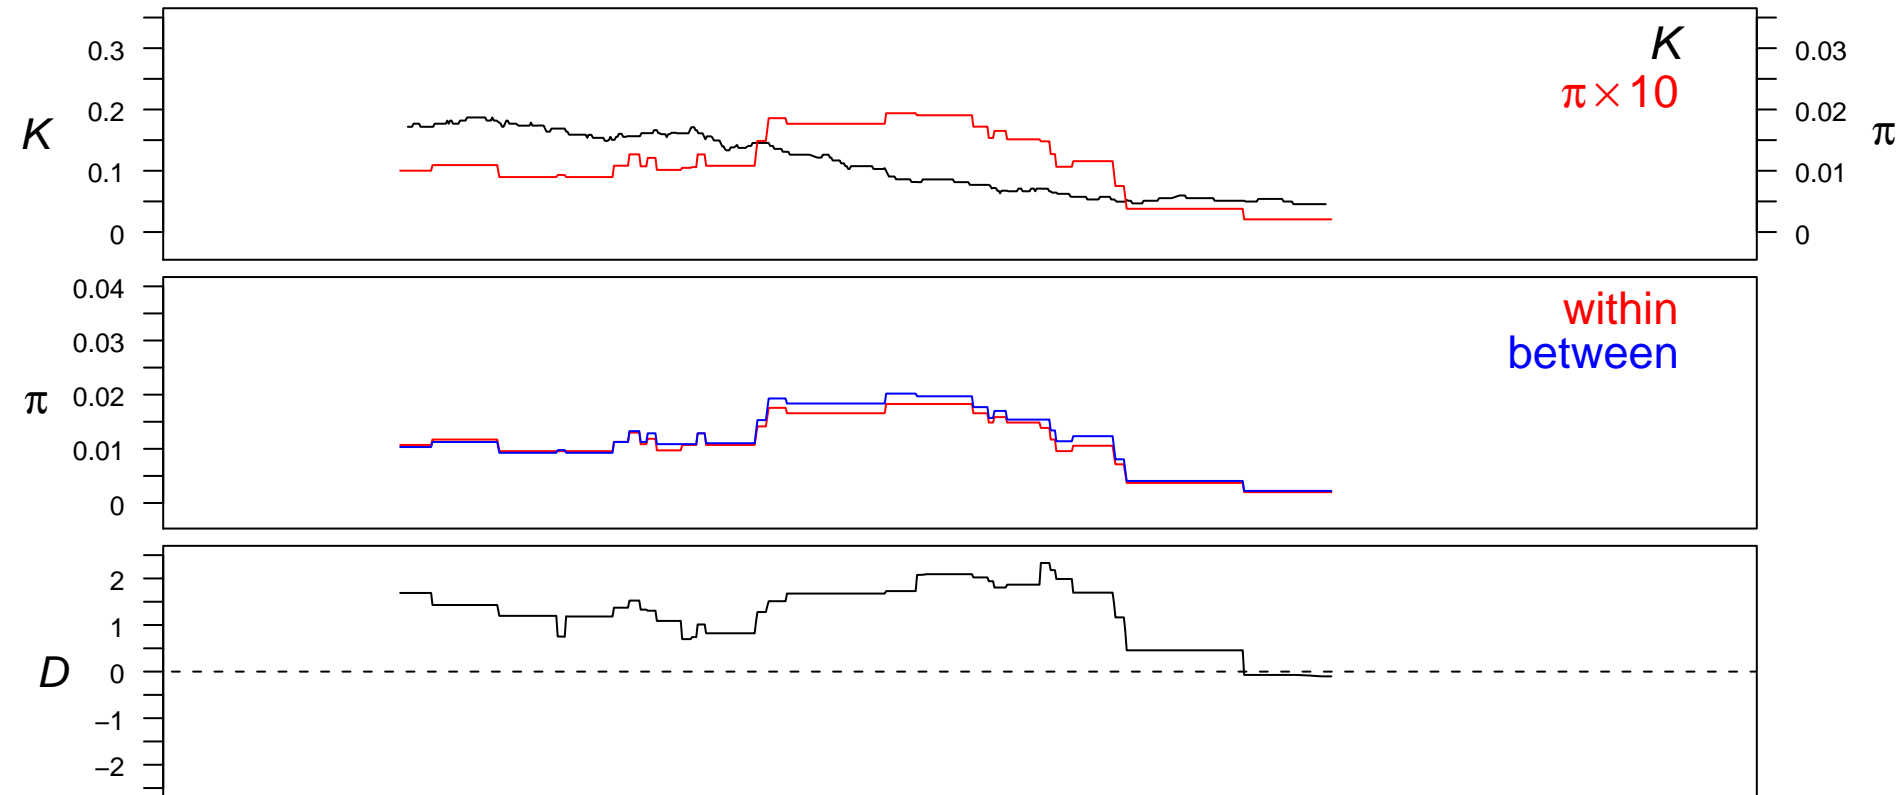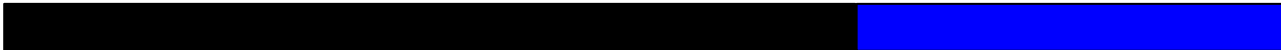

# extra macrochaetae

*D.pseudoobscura*

*D.melanogaster*

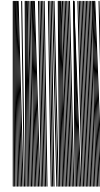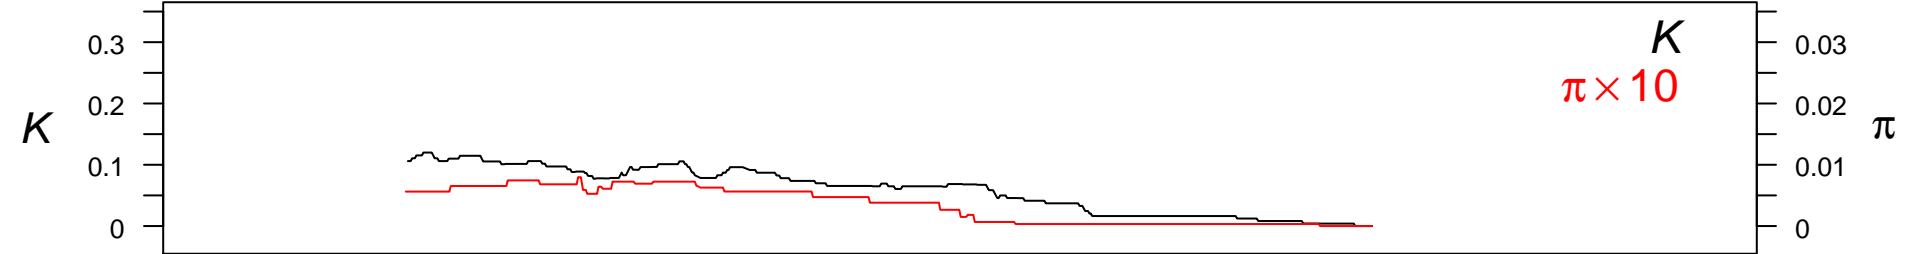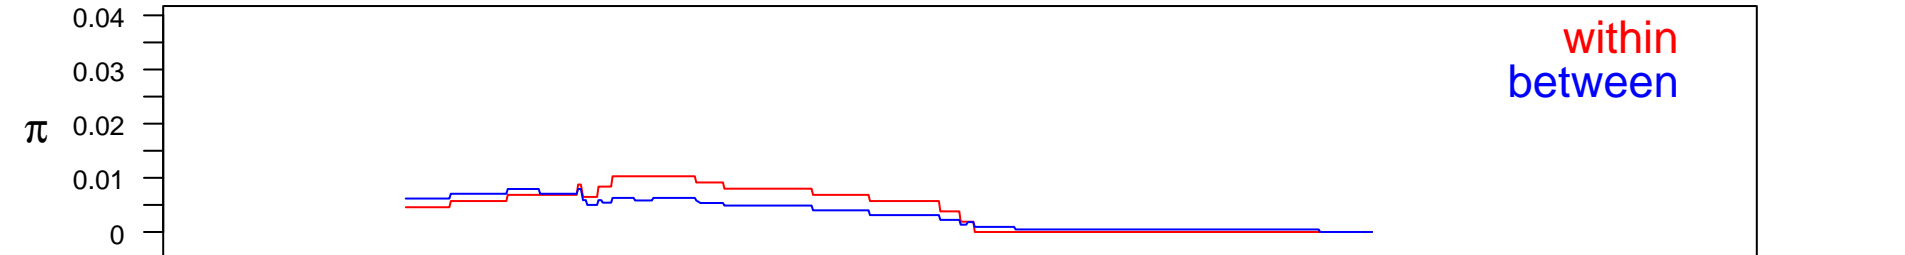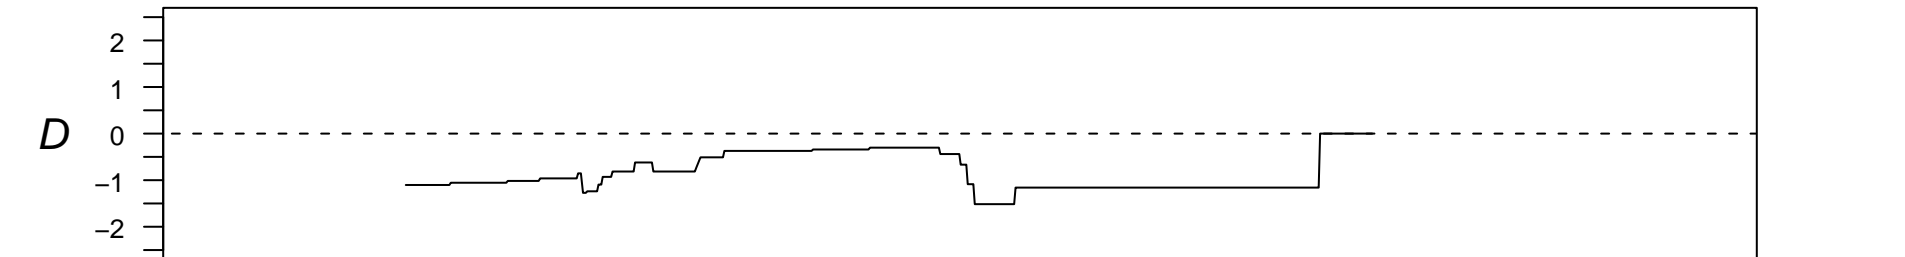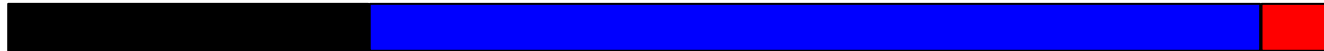

# friend of echinoid

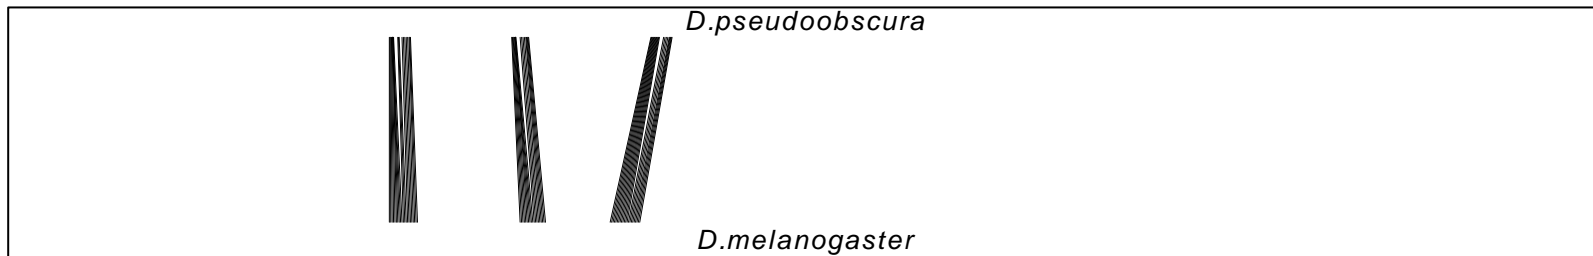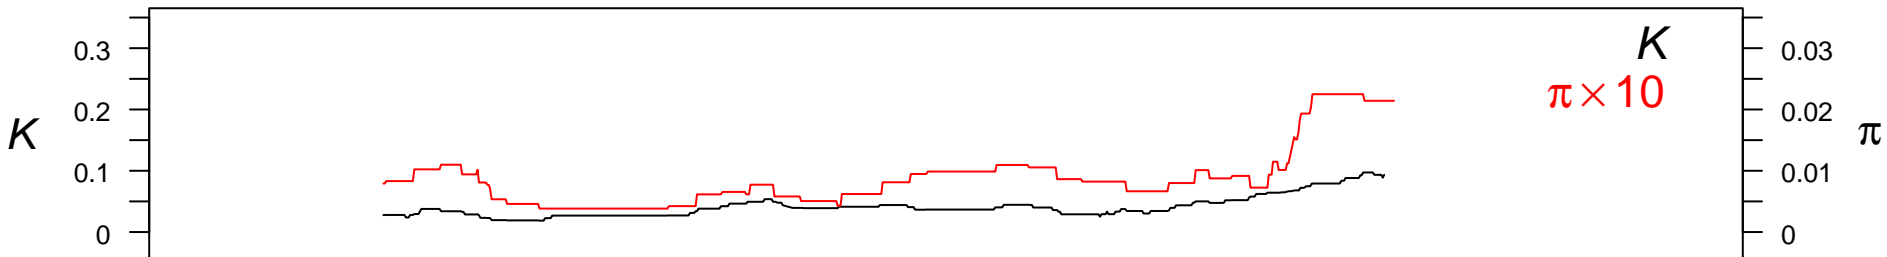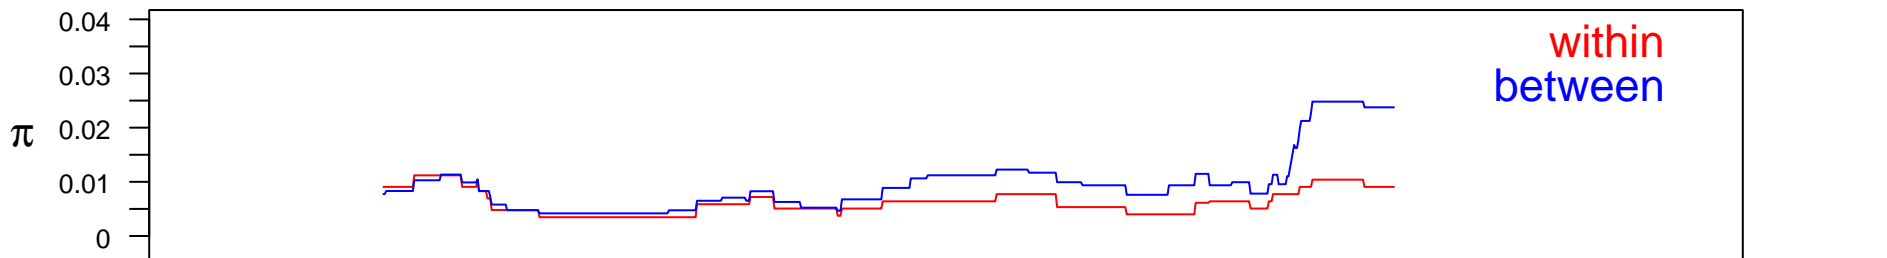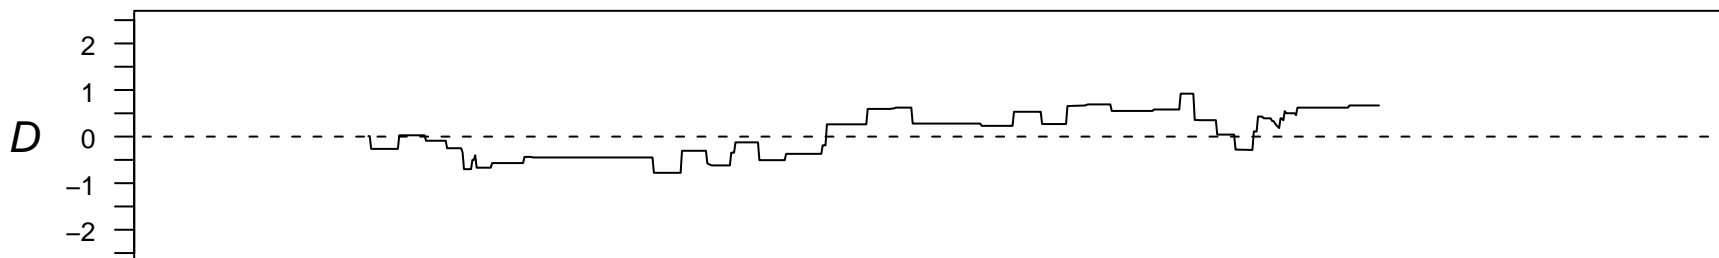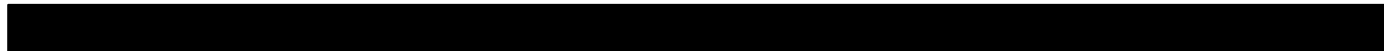

# Hairless

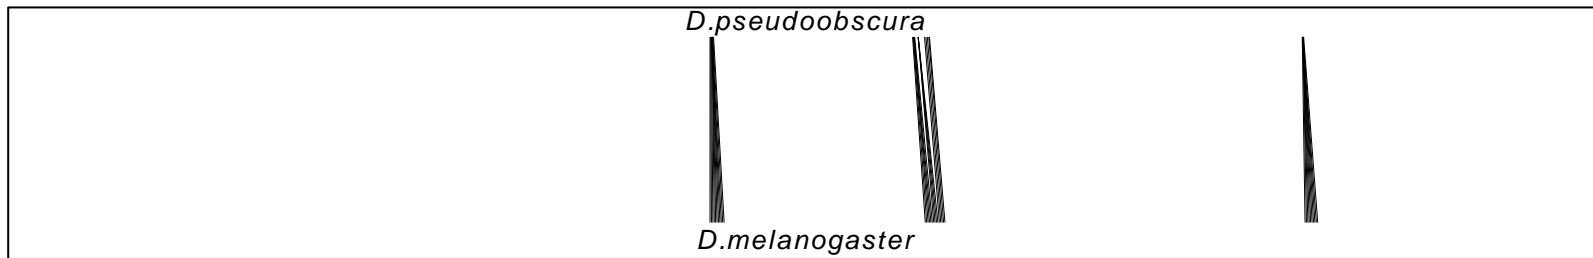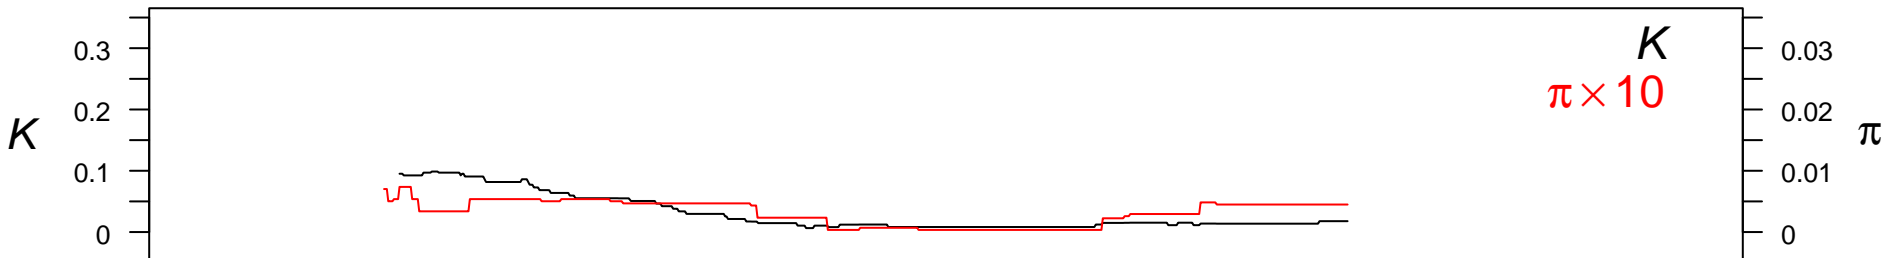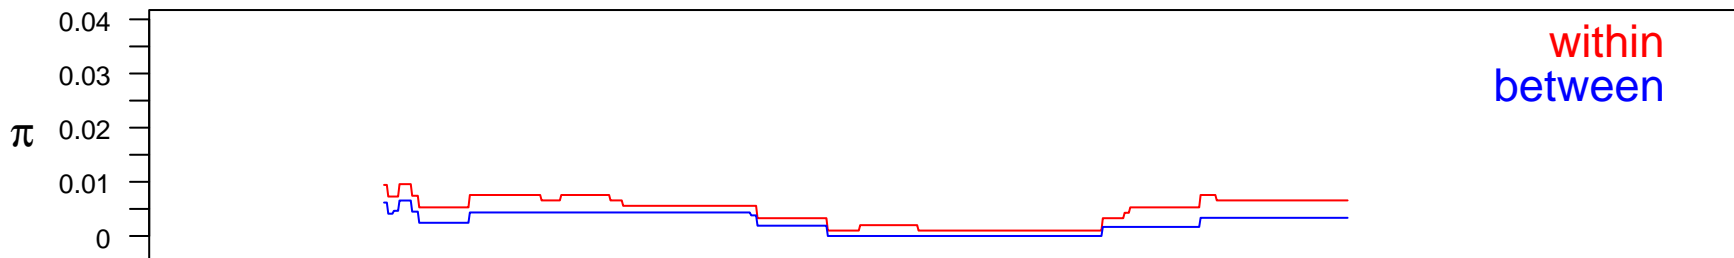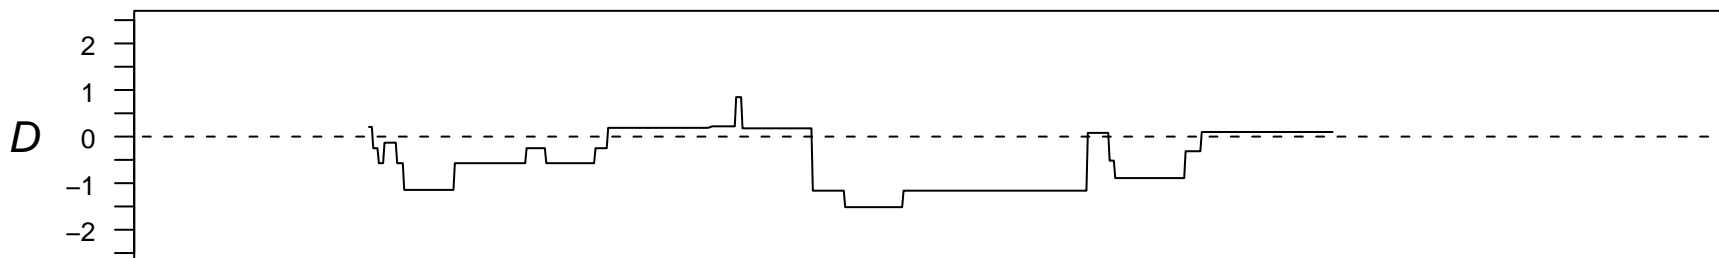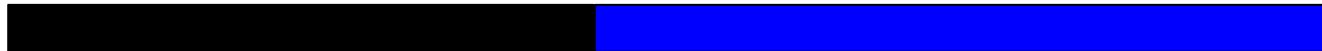

# mastermind

*D.pseudoobscura*

*D.melanogaster*

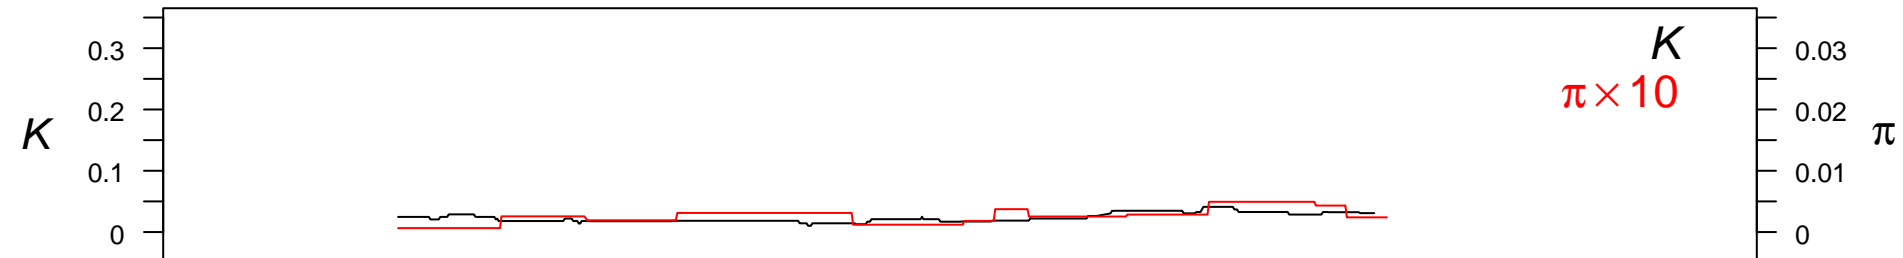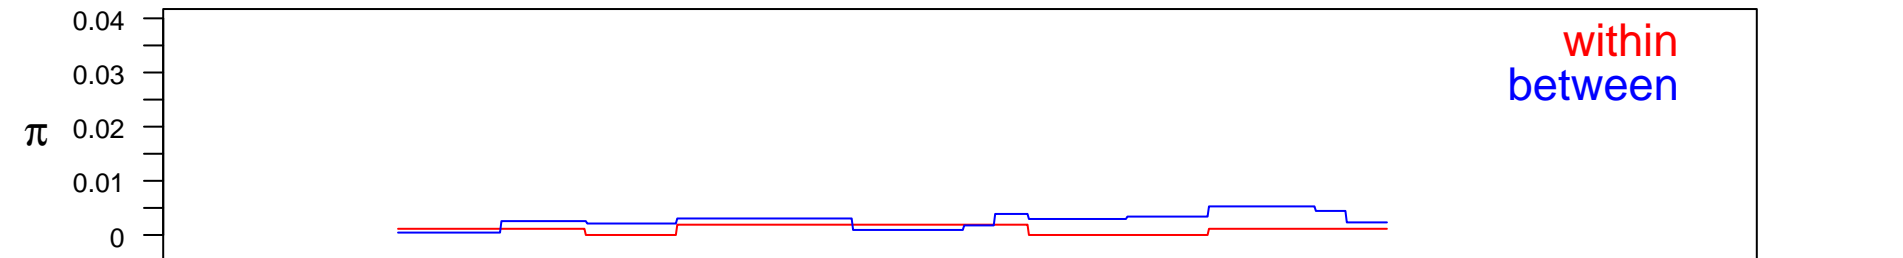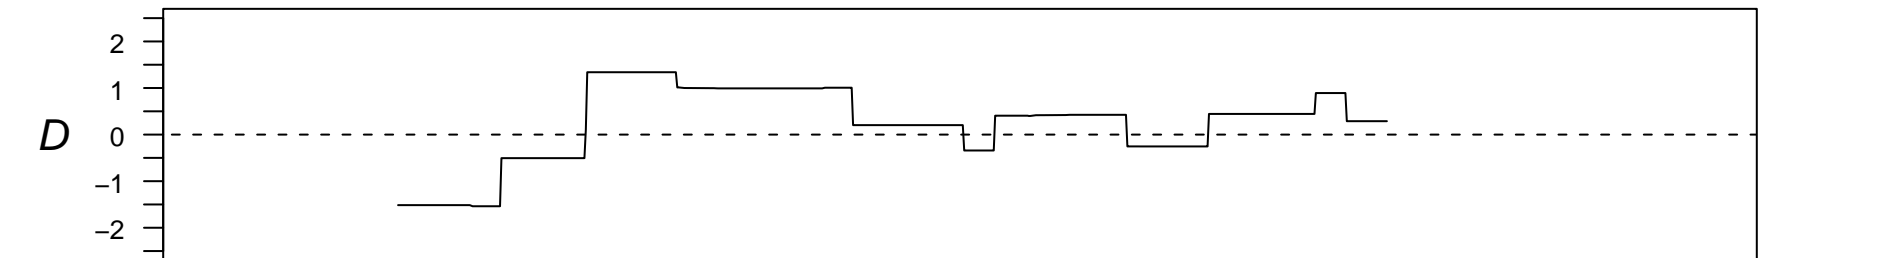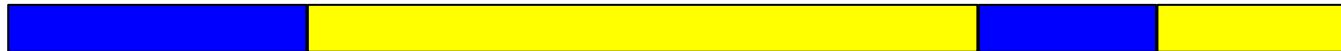

# neuralized

*D.pseudoobscura*

*D.melanogaster*

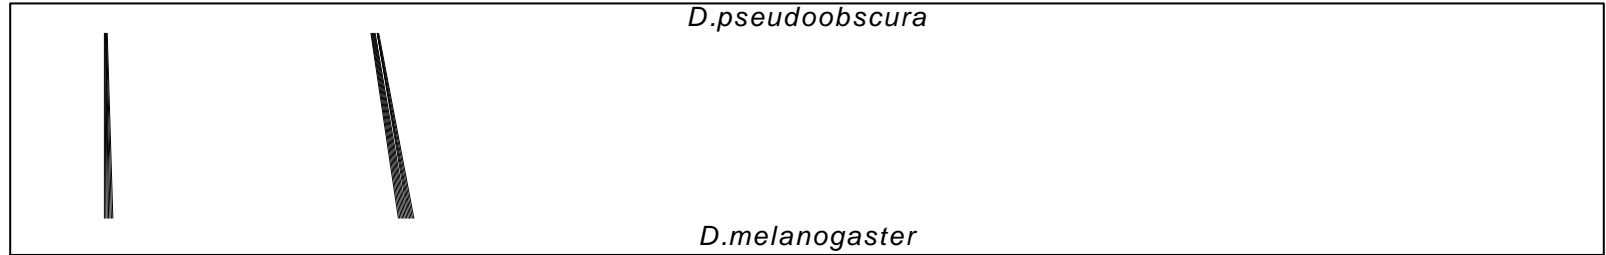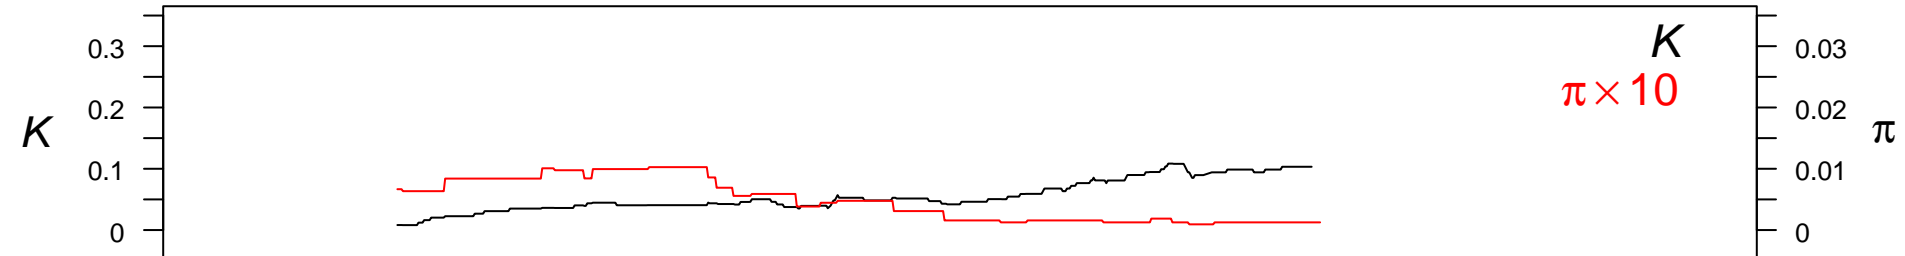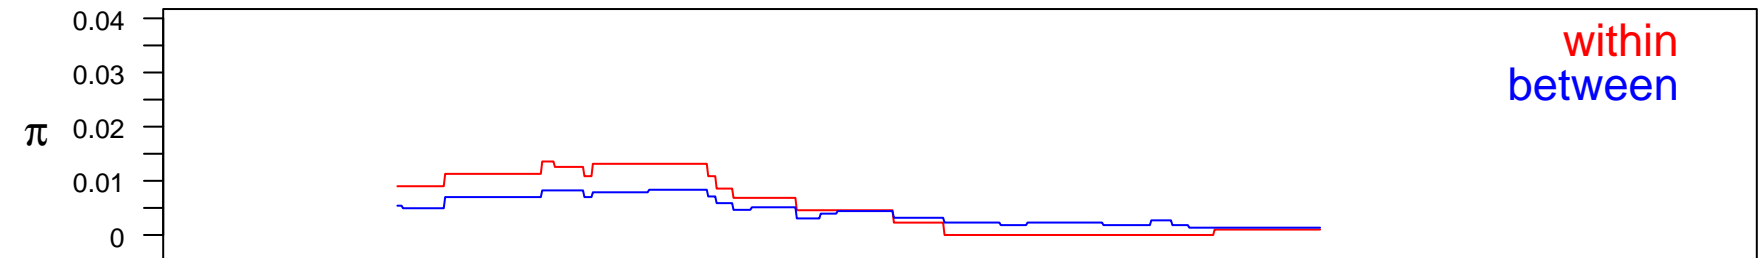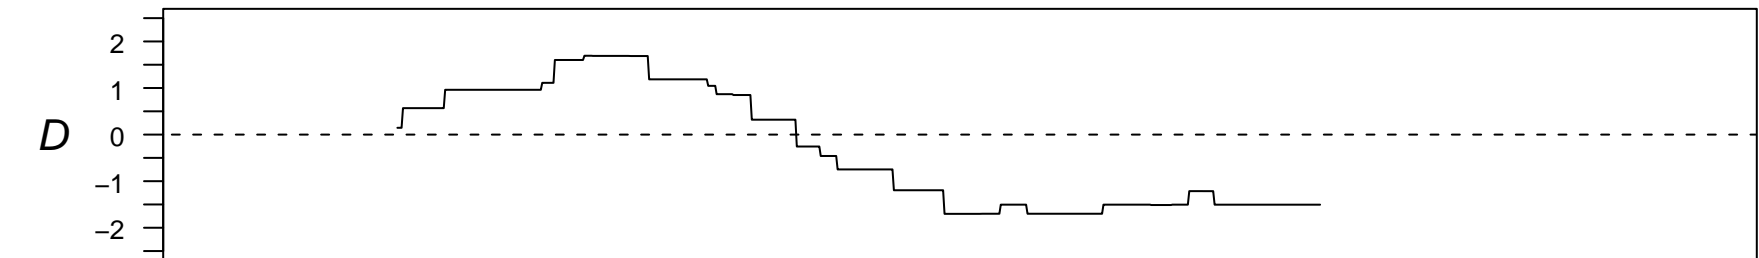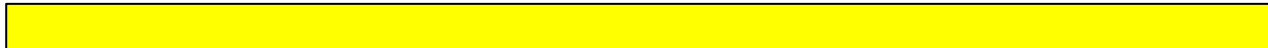



# numb

*D.pseudoobscura*

*D.melanogaster*

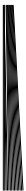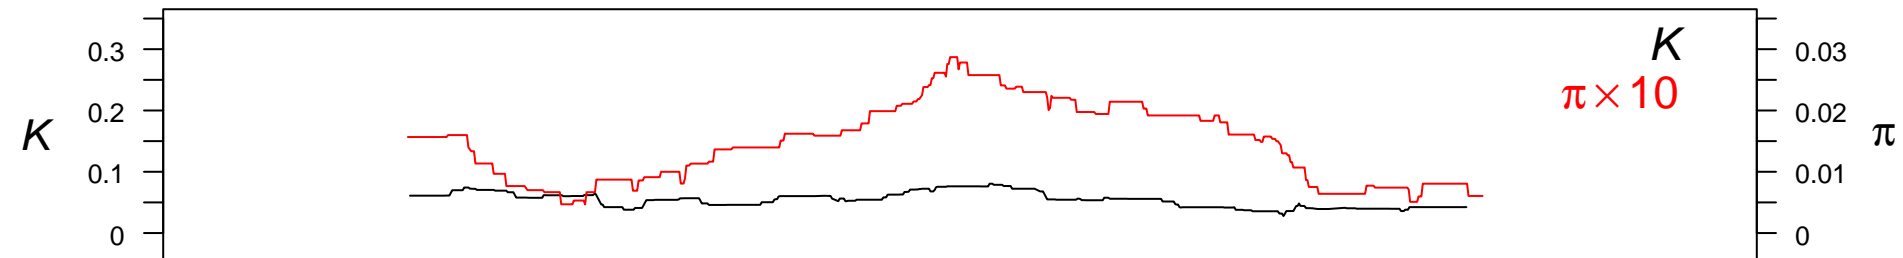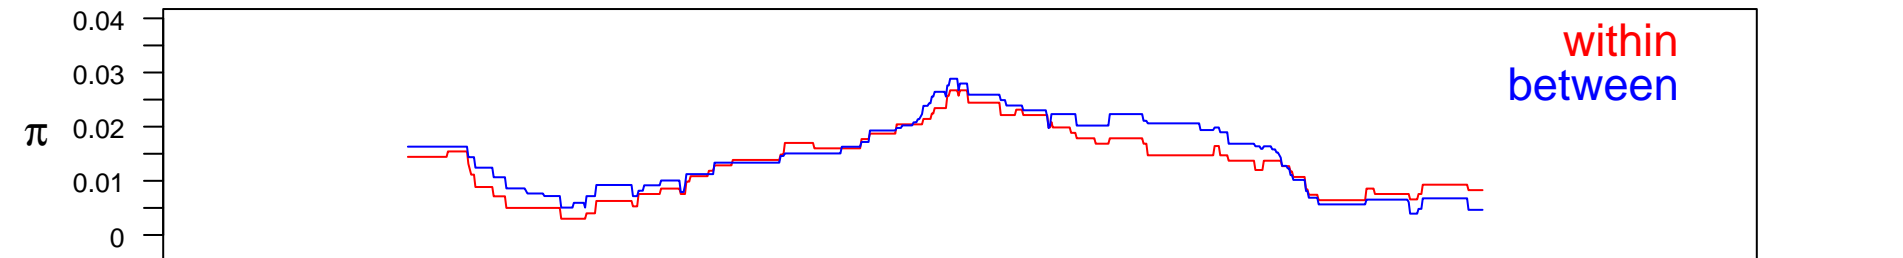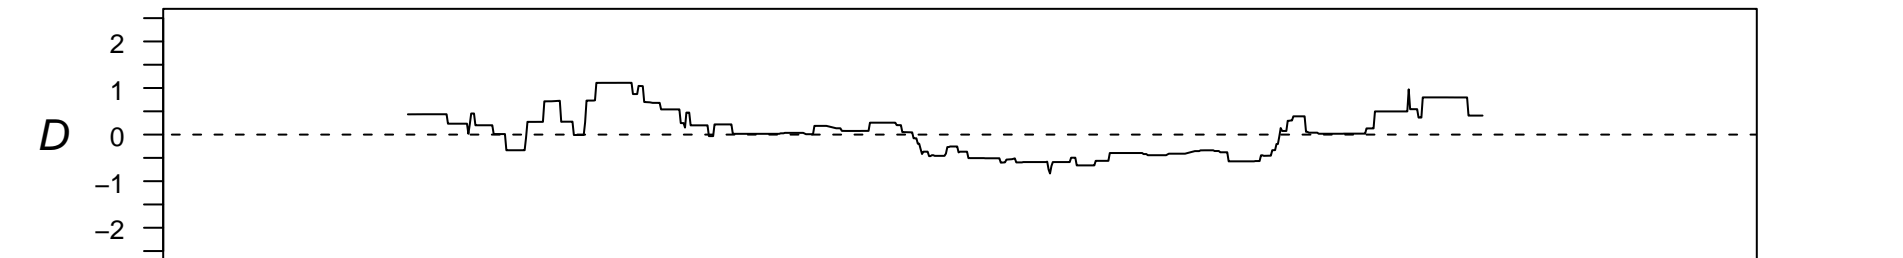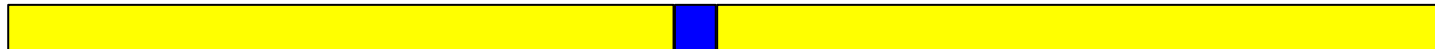

# pointed

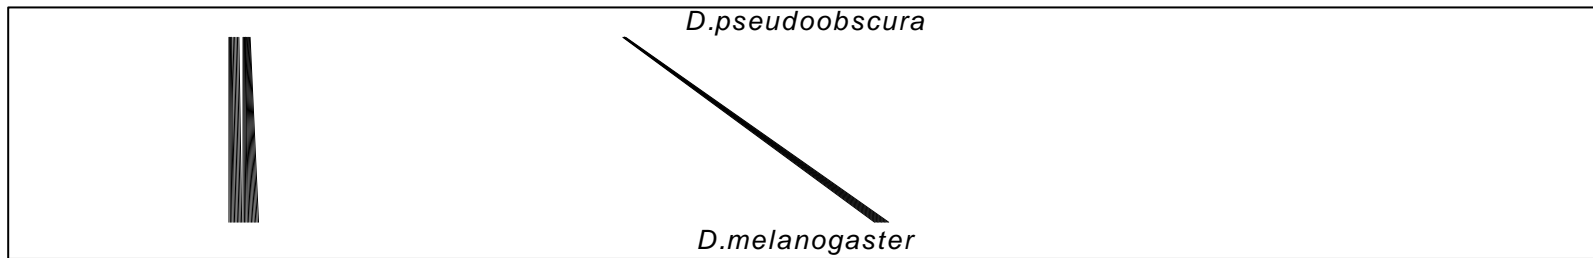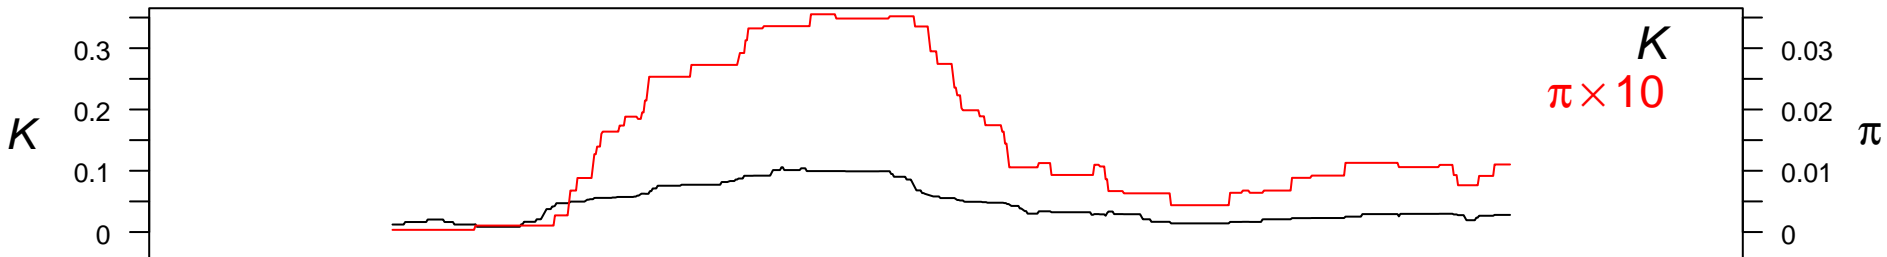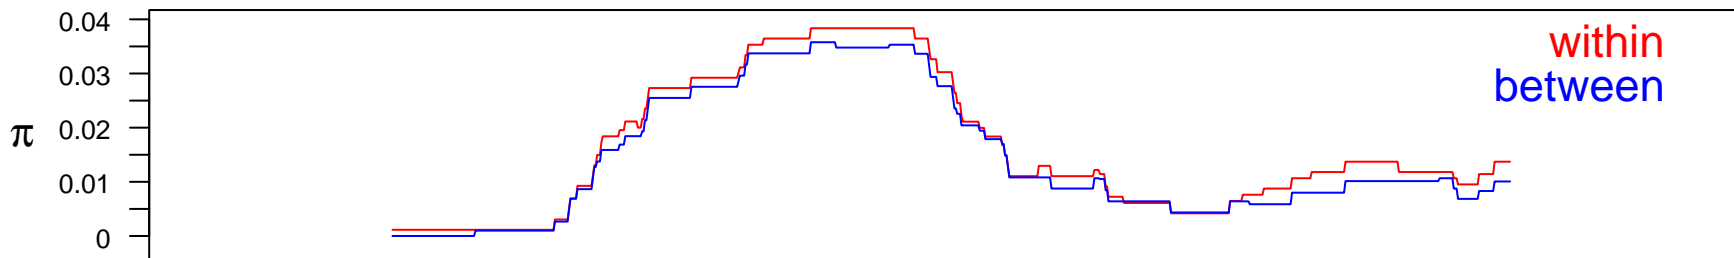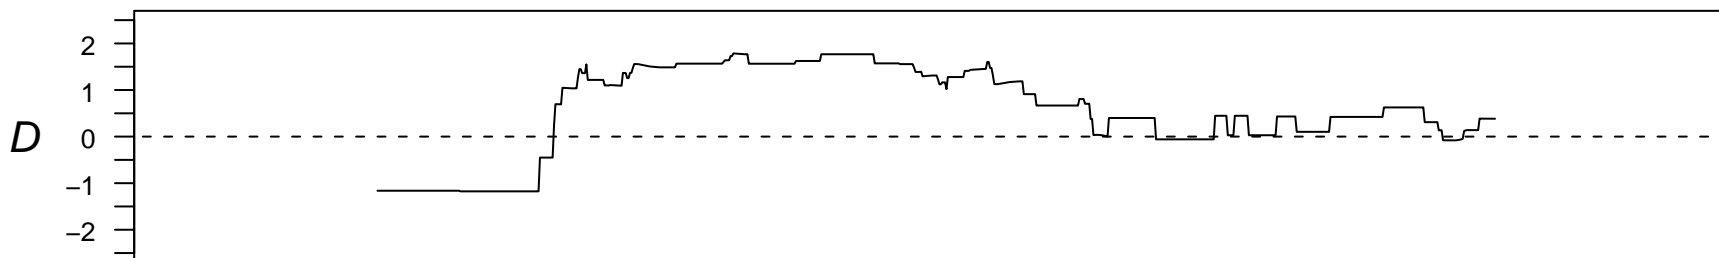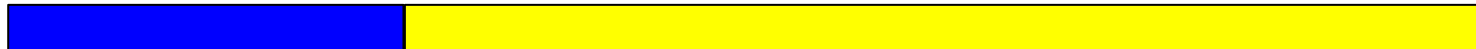

# quemao

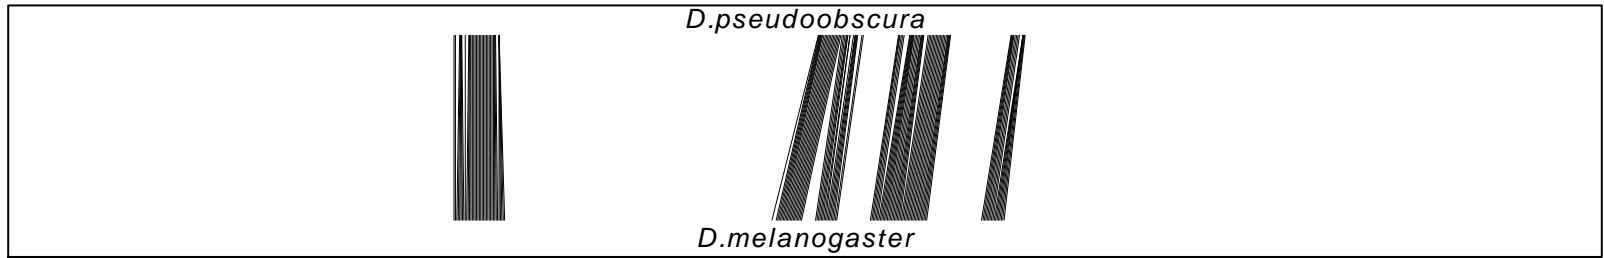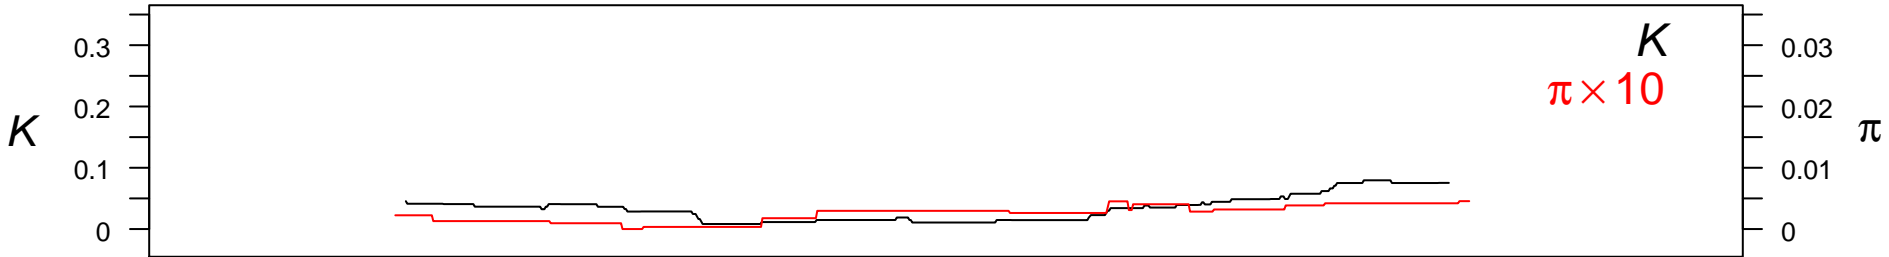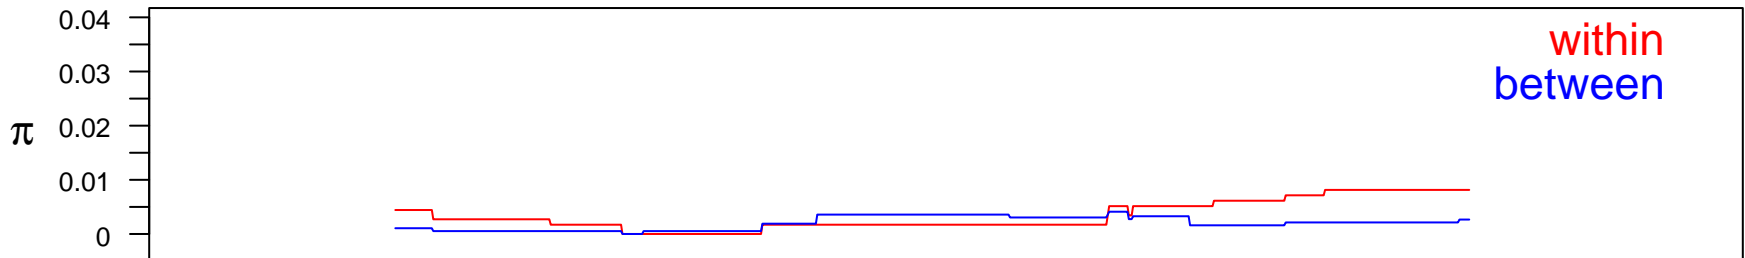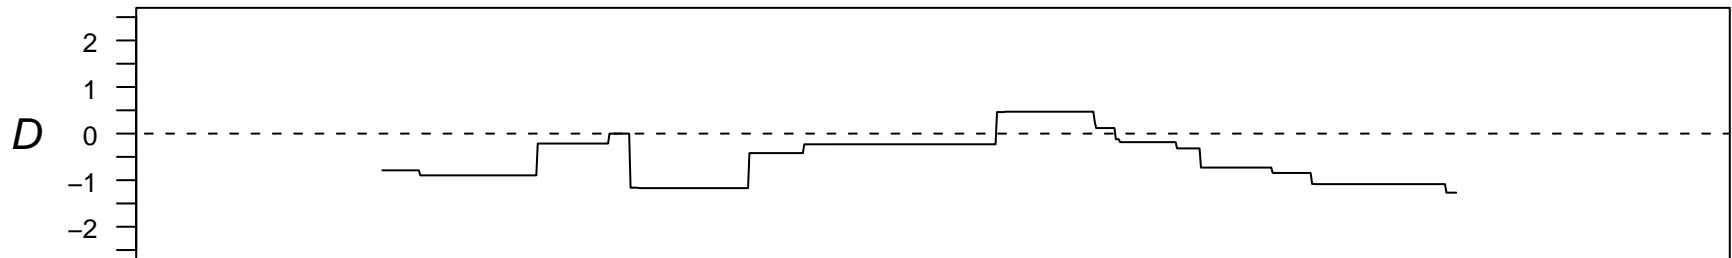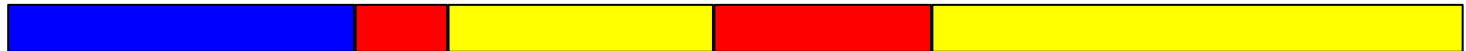

# scabrous

*D.pseudoobscura*

*D.melanogaster*

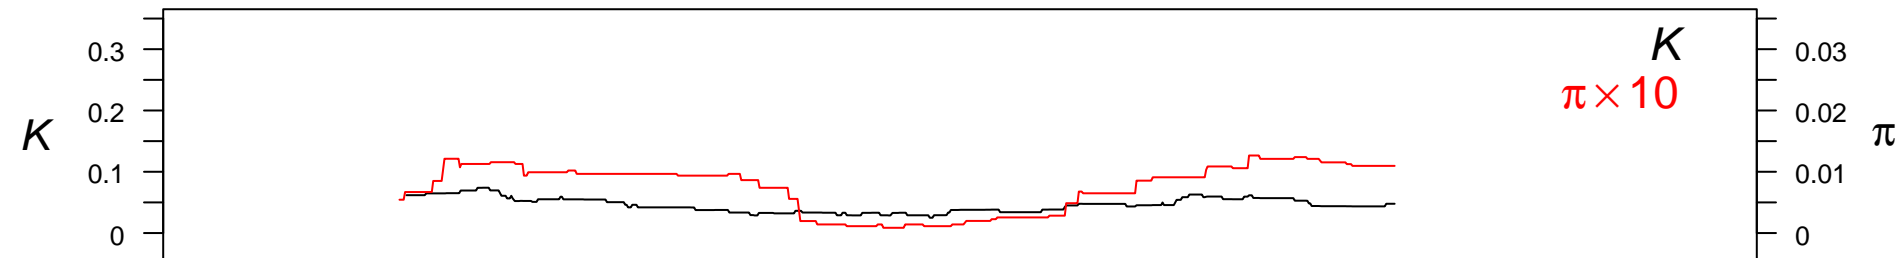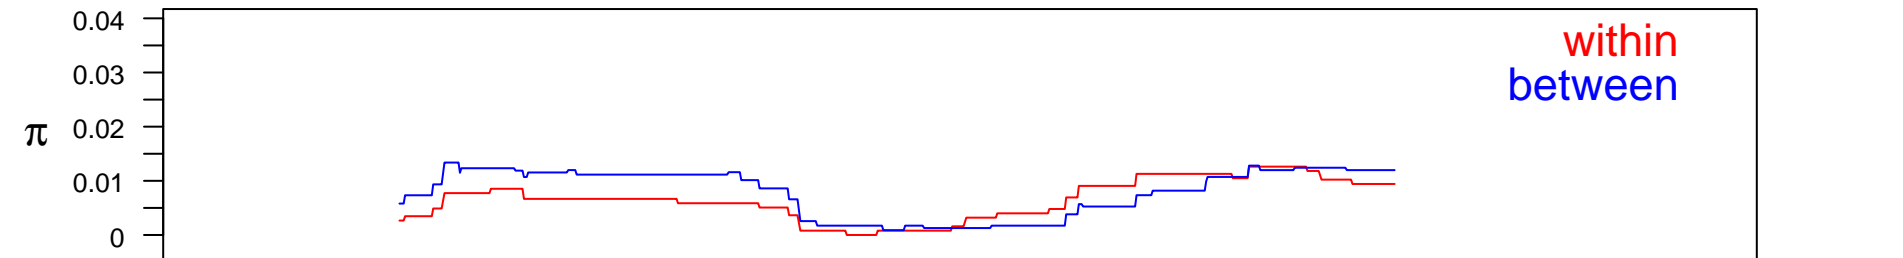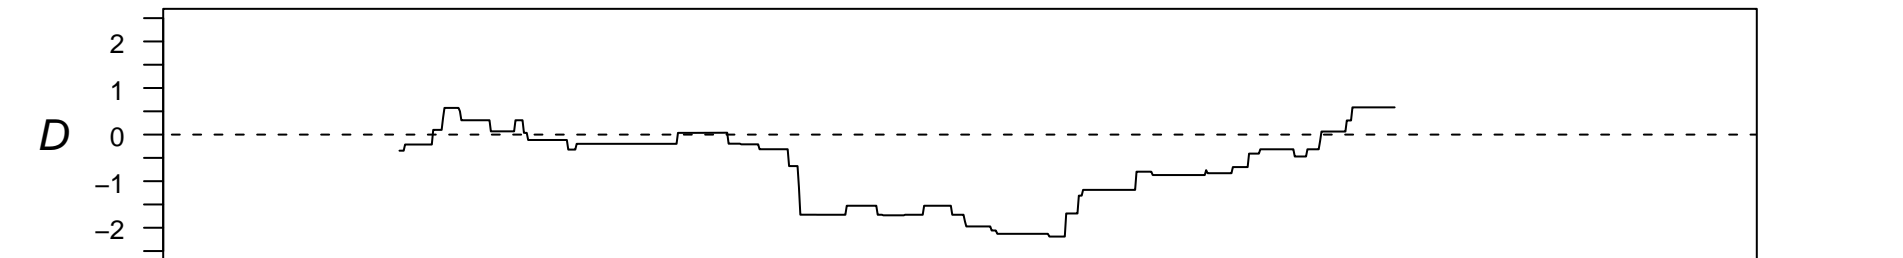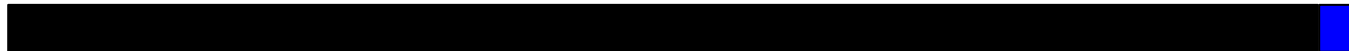

# scalloped

*D.pseudoobscura*

*D.melanogaster*

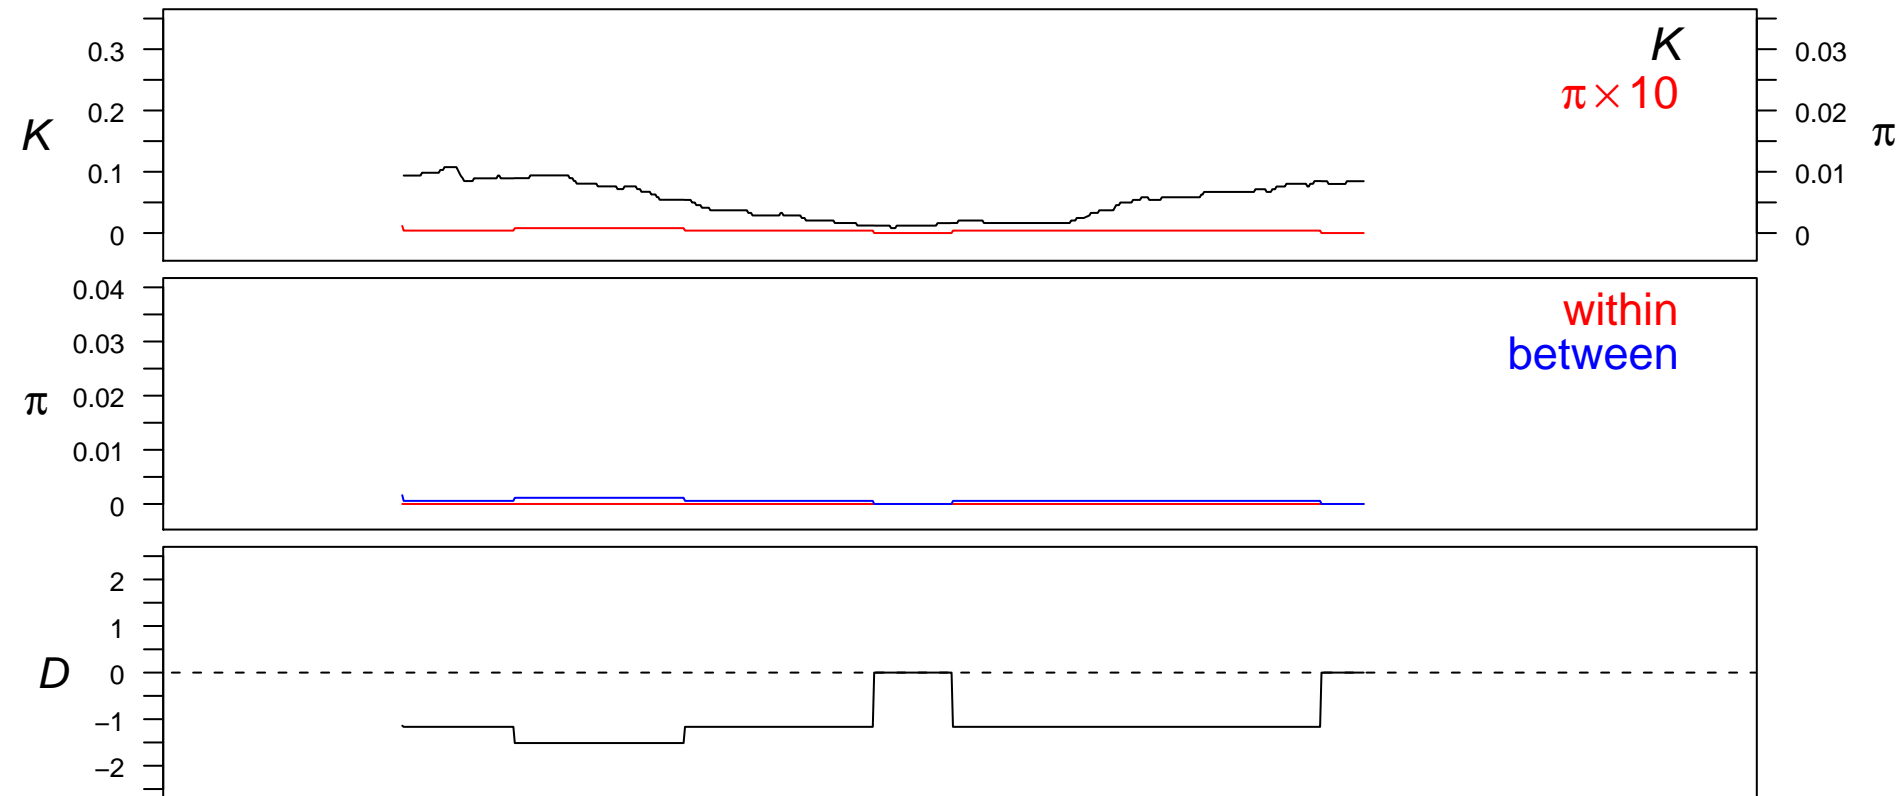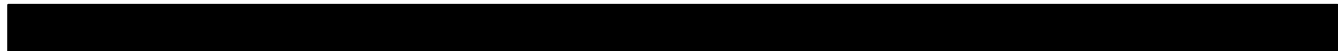

# Serrate

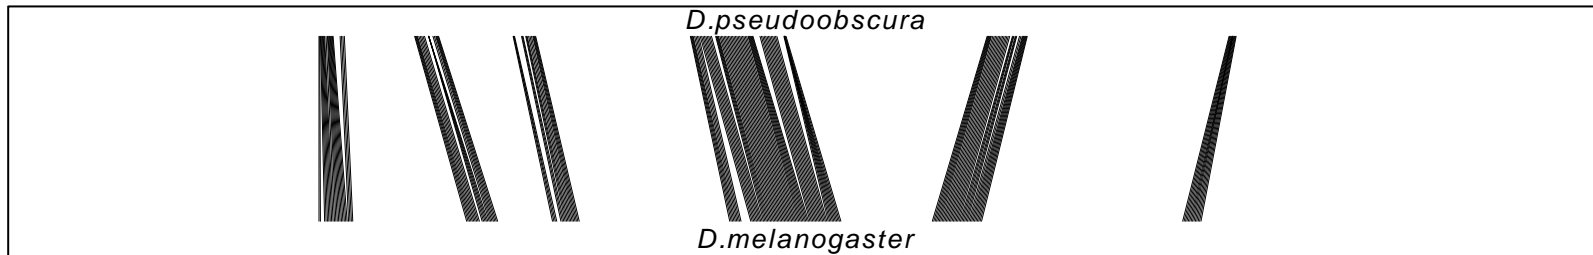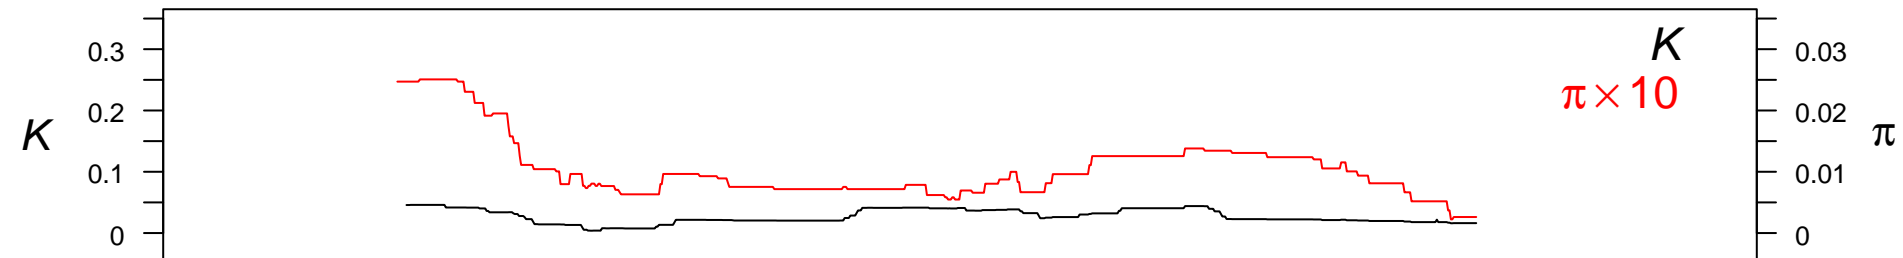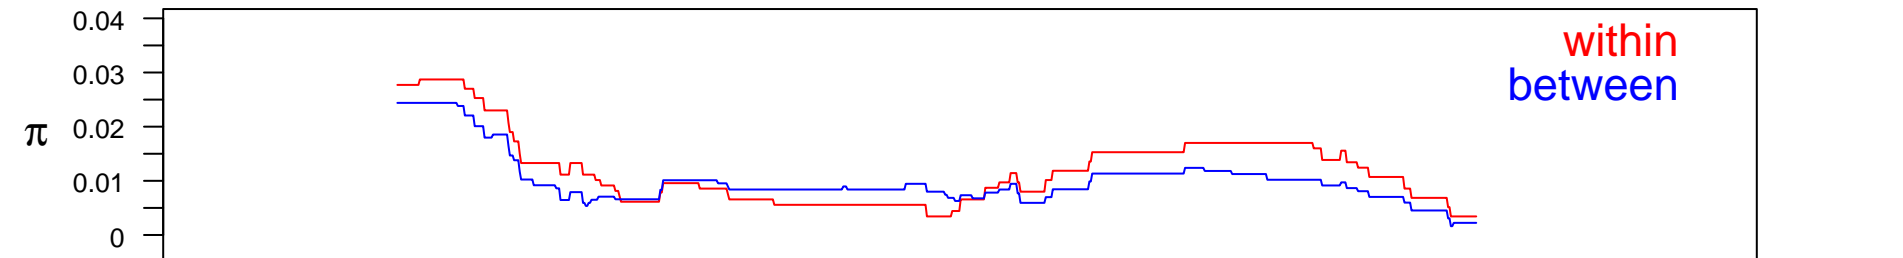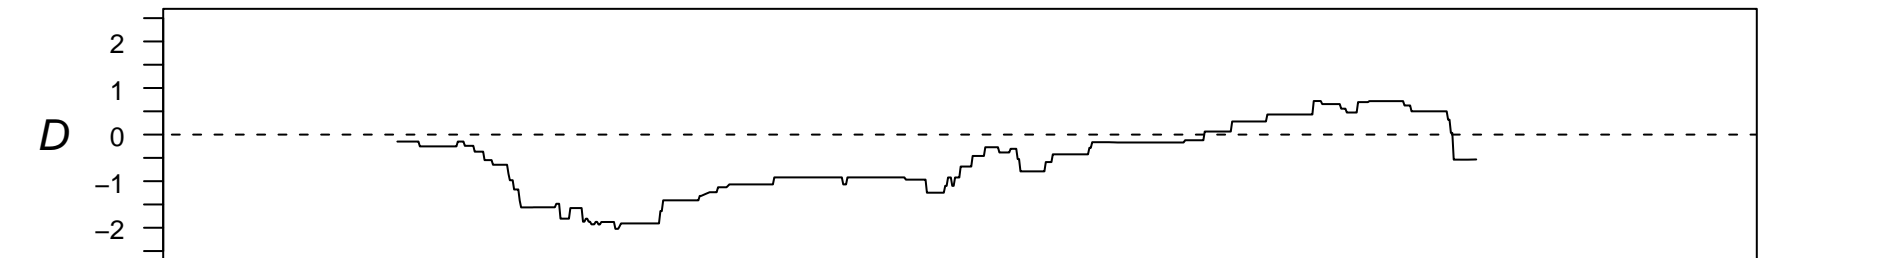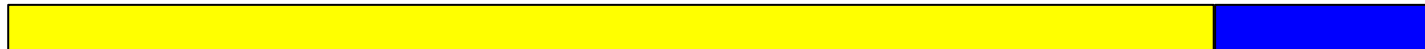

# smooth

*D.pseudoobscura*

*D.melanogaster*

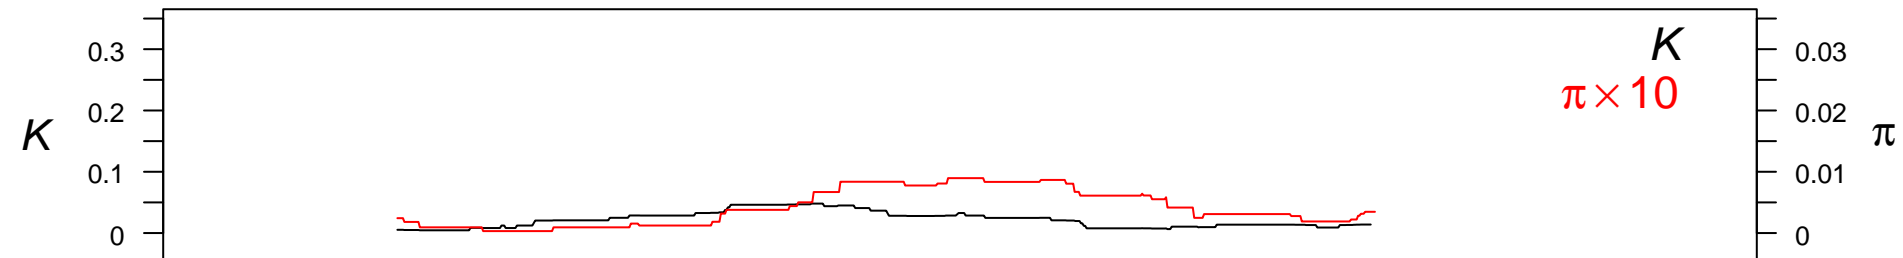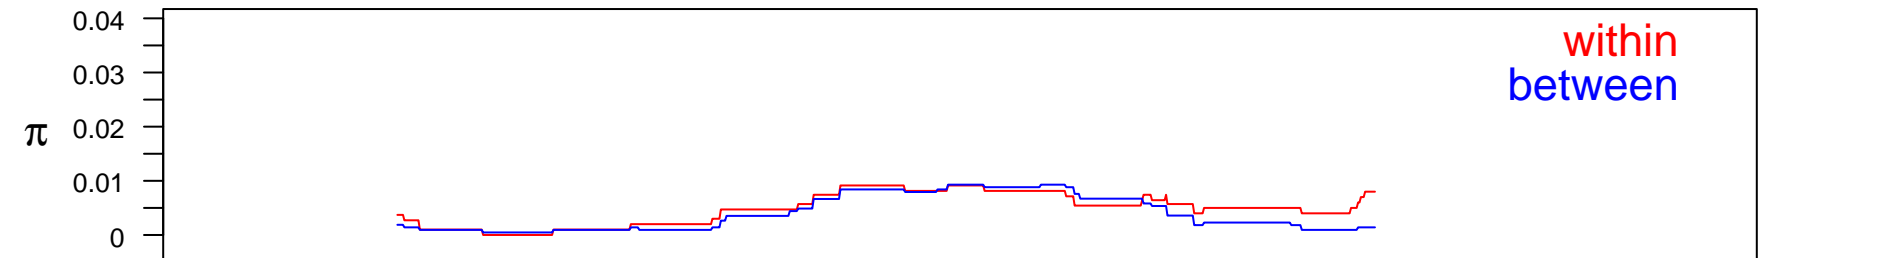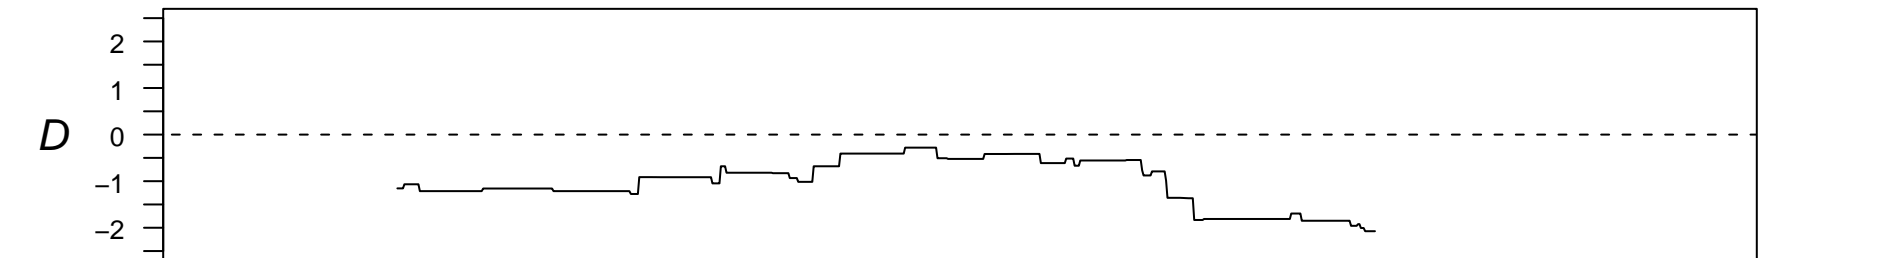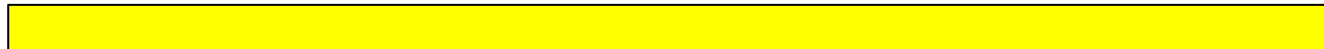

# split ends

*D.pseudoobscura*

*D.melanogaster*

$K$   
 $\pi \times 10$

$\pi$

within  
between

$D$

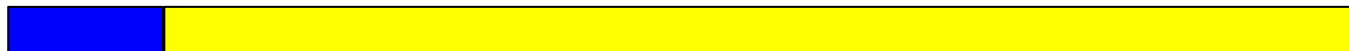



# tramtrack

*D.pseudoobscura*

*D.melanogaster*

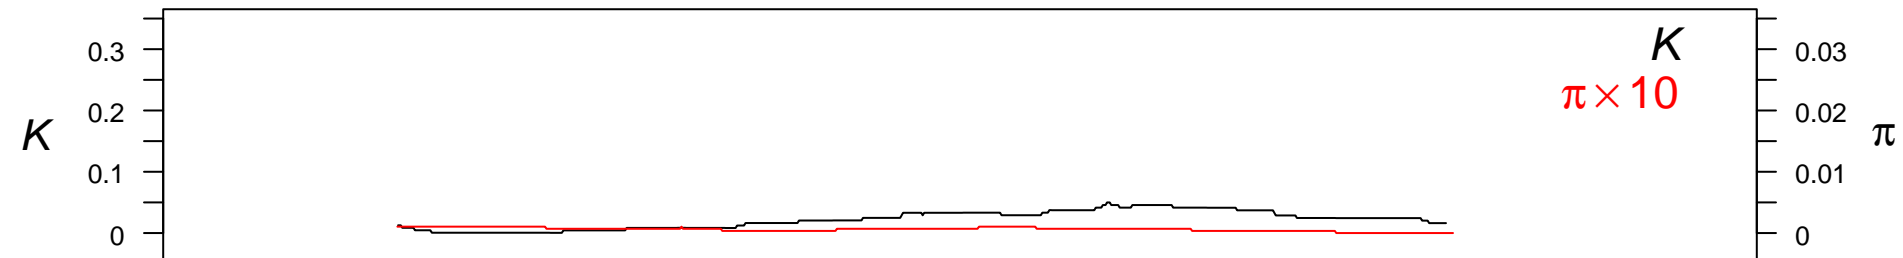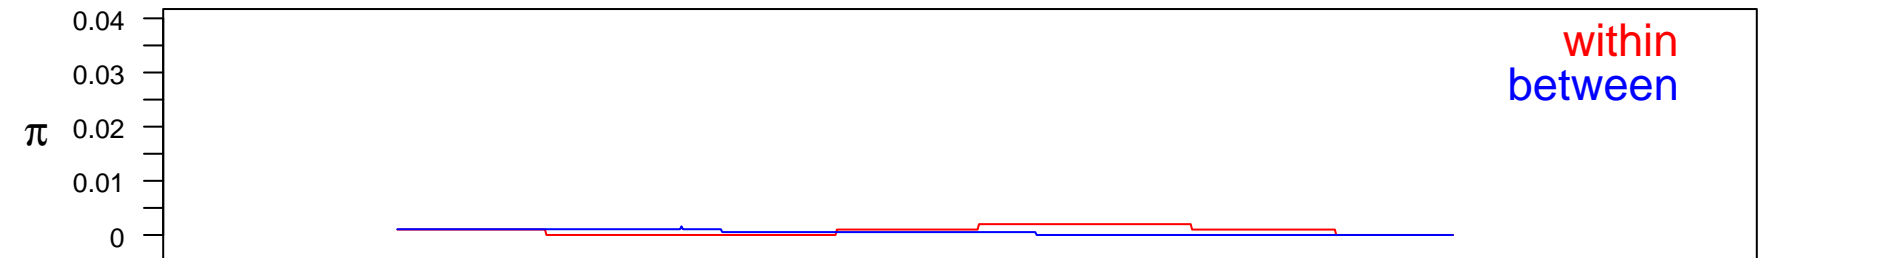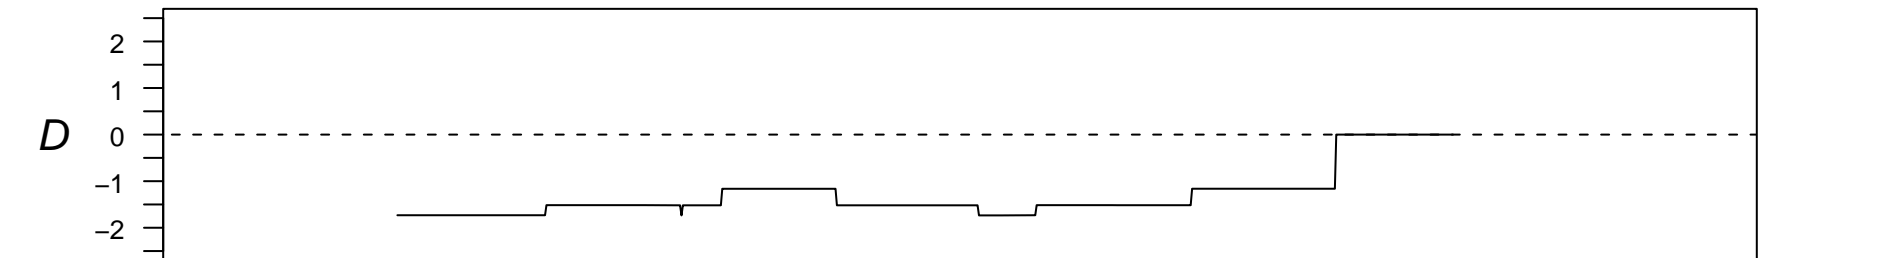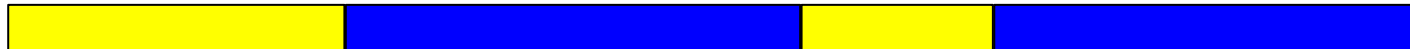

# vein

*D.pseudoobscura*

*D.melanogaster*

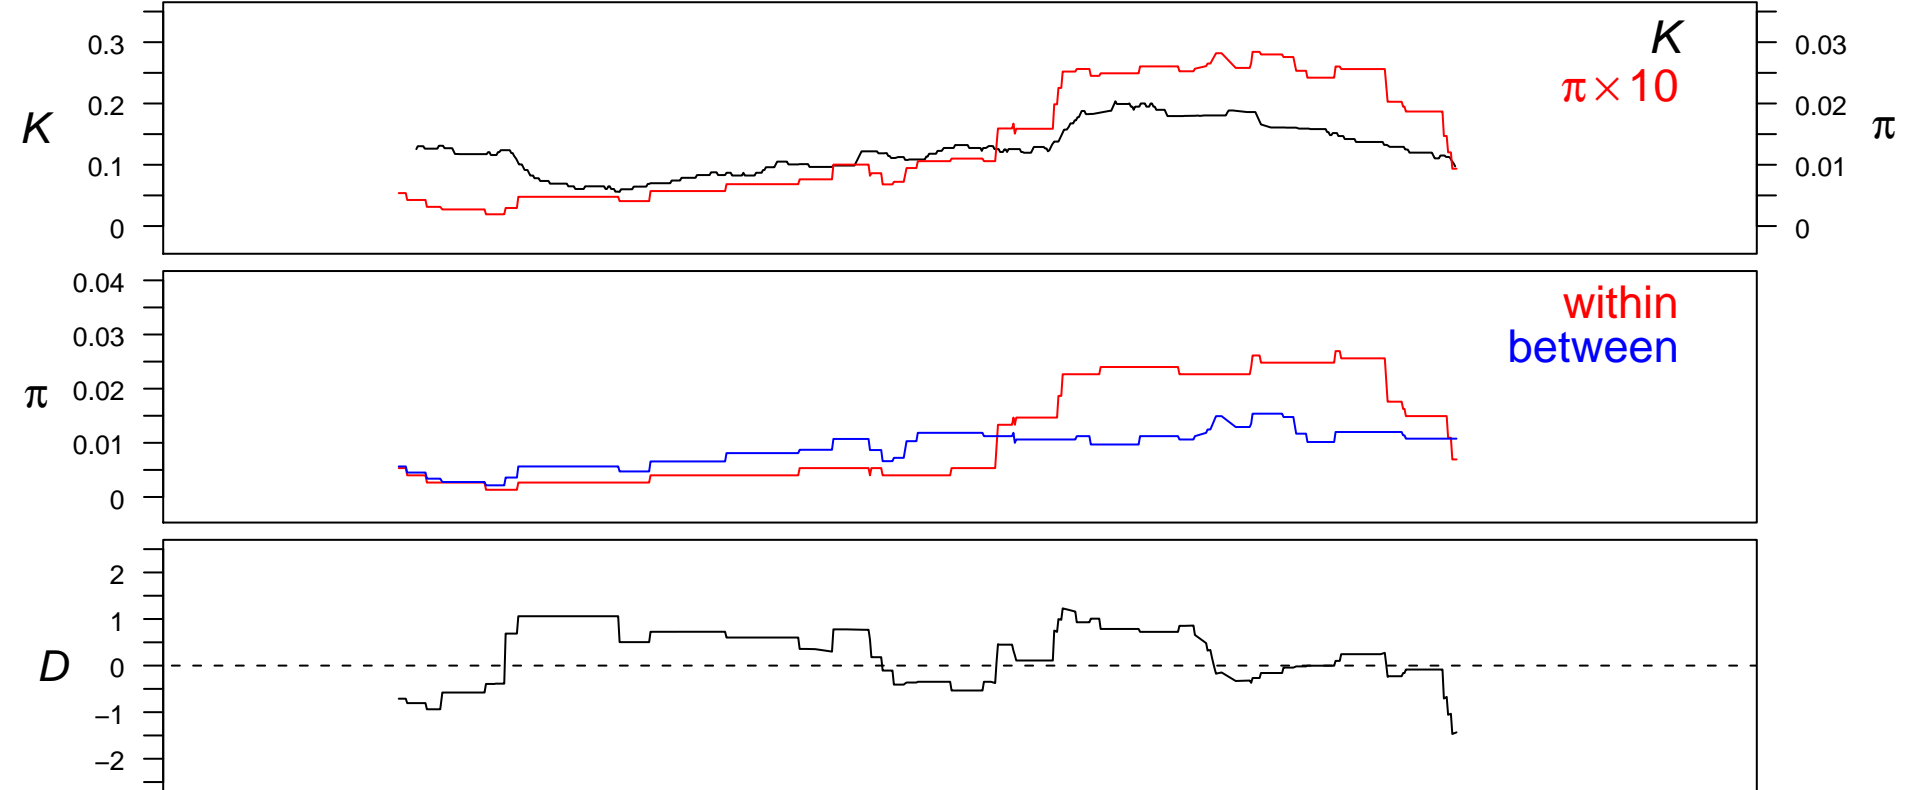

# wingless

*D.pseudoobscura*

*D.melanogaster*

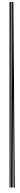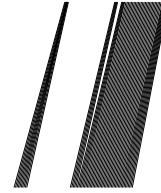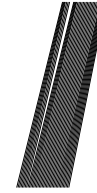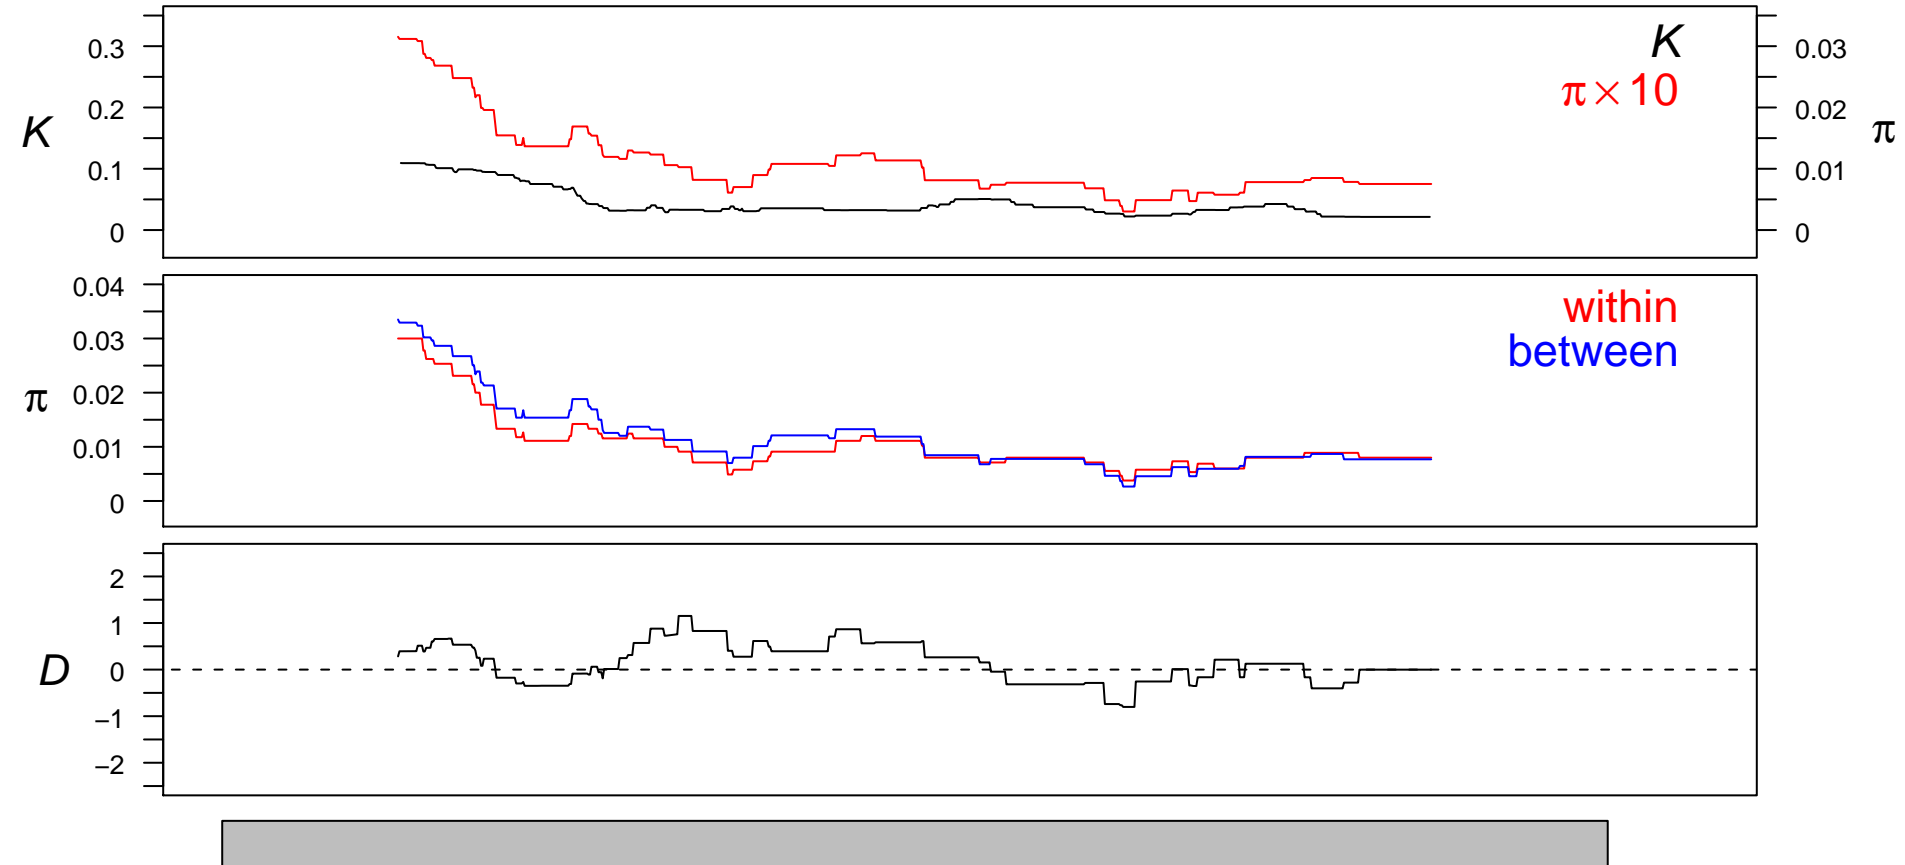

Supplement: pnas_102_suppl-1_6614__3.pdf [file pnas_102_suppl-1_6614__3.pdf]
